# Supplementary material
Source: publisher figshare collection journal article supplement (https://gsajournals.figshare.com/ndownloader/files/27462743)
Supplement: Supplementary file 1 [file 27462743]

## Sheet: README
	README
0	The first sheet shows the amount of FASTQS for each sample or group. The second sheet shows regular biome contigs and amount removed of human, mice, or chordata (after human or mice). The last sheet shows dark biome contigs remaining after filtering for repetitive sequences (DUST) or filtering by comparing nt similarity between heirarchies (single, group, all) by LAST NOTE: our study was conducte…

## Sheet: FASTQ amount
	dataset	sample	condition	initial_reads	trimmed_reads	mapped_star	unmapped_star	mapped_bowtie2	unmapped_bowtie2	unmapped_final
0	OurStudyALSblood	all	all	9519557490	8646170593	8401587171	244583422	10461981	234121441	234121441
1	OurStudyALSblood	A	A	2351709081	2139064040	2079381368	59682672	2295579	57387093	57387093
2	OurStudyALSblood	B	B	2366836213	2155040560	2090224300	64816260	2718716	62097544	62097544
3	OurStudyALSblood	C	C	2438403644	2212440552	2151999431	60441121	2491634	57949487	57949487
4	OurStudyALSblood	D	D	2362608552	2139625441	2079982072	59643369	2956052	56687317	56687317
5	OurStudyALSblood	LP00001_GT17-02932_CGCTCATT-AGGATAGG_S15_L004	D	77120961	68796821	67305048	1491773	135065	1356708	1356708
6	OurStudyALSblood	LP00005_GT17-02918_TCCGGAGA-AGGATAGG_S4_L001	A	88016163	79842194	77366311	2475883	55979	2419904	2419904
7	OurStudyALSblood	LP00017_GT17-02941_CGCTCATT-GTCAGTAC_S22_L006	C	80089775	71602592	69388314	2214278	118889	2095389	2095389
8	OurStudyALSblood	LP00018_GT17-03014_TCCGGAGA-AGGATAGG_S28_L007	A	83372841	76591344	74541615	2049729	133607	1916122	1916122
9	OurStudyALSblood	LP00020_GT17-02925_ATTACTCG-GTCAGTAC_S6_L002	C	77607537	69368385	67419845	1948540	52779	1895761	1895761
10	OurStudyALSblood	LP00023_GT17-02957_ATTCAGAA-GTCAGTAC_S17_L005	C	85036457	76459049	74032001	2427048	77902	2349146	2349146
11	OurStudyALSblood	LP00024_GT17-02946_GAATTCGT-AGGCTATA_S10_L003	A	81419193	73562759	71817762	1744997	66568	1678429	1678429
12	OurStudyALSblood	LP00025_GT17-02942_GAGATTCC-ACGTCCTG_S23_L006	A	73266738	65514050	63273890	2240160	60534	2179626	2179626
13	OurStudyALSblood	LP00027_GT17-02968_CTGAAGCT-CTTCGCCT_S26_L007	D	78413880	70193285	67622854	2570431	93991	2476440	2476440
14	OurStudyALSblood	LP00030_GT17-02933_CGCTCATT-TCAGAGCC_S14_L004	C	87589647	78598210	76016936	2581274	184236	2397038	2397038
15	OurStudyALSblood	LP00031_GT17-02945_ATTCAGAA-GCCTCTAT_S12_L003	C	80633935	73027017	70933281	2093736	48888	2044848	2044848
16	OurStudyALSblood	LP00034_GT17-02937_CGCTCATT-TAAGATTA_S17_L005	C	76011563	67908697	66269509	1639188	79656	1559532	1559532
17	OurStudyALSblood	LP00041_GT17-02982_TCCGCGAA-AGGATAGG_S6_L002	A	87723985	82174353	79319534	2854819	129384	2725435	2725435
18	OurStudyALSblood	LP00043_GT17-02964_CTGAAGCT-AGGATAGG_S24_L006	D	82226827	73899108	71900673	1998435	95262	1903173	1903173
19	OurStudyALSblood	LP00045_GT17-02919_TCCGGAGA-TCAGAGCC_S2_L001	B	81247536	73828733	71063075	2765658	132571	2633087	2633087
20	OurStudyALSblood	LP00046_GT17-02936_CGCTCATT-CTTCGCCT_S18_L005	D	79992007	71611795	69092218	2519577	120860	2398717	2398717
21	OurStudyALSblood	LP00069_GT17-02951_GAATTCGT-TCAGAGCC_S26_L007	B	82850877	73516705	71416817	2099888	140396	1959492	1959492
22	OurStudyALSblood	LP00070_GT17-02935_GAGATTCC-TCAGAGCC_S13_L004	B	66165127	58882116	57086088	1796028	69923	1726105	1726105
23	OurStudyALSblood	LP00075_GT17-02952_ATTCAGAA-CTTCGCCT_S15_L004	D	83029105	74943015	72463715	2479300	44490	2434810	2434810
24	OurStudyALSblood	LP00083_GT17-02934_GAGATTCC-AGGATAGG_S16_L004	A	67555698	60258680	58443400	1815280	110187	1705093	1705093
25	OurStudyALSblood	LP00086_GT17-02929_CGCTCATT-GCCTCTAT_S12_L003	C	73731093	65753637	63509665	2243972	74099	2169873	2169873
26	OurStudyALSblood	LP00087_GT17-02943_GAGATTCC-GTCAGTAC_S24_L006	B	72361146	64445949	62667889	1778060	106317	1671743	1671743
27	OurStudyALSblood	LP00094_GT17-02962_TAATGCGC-AGGCTATA_S31_L008	A	57067415	50794475	49376030	1418445	111663	1306782	1306782
28	OurStudyALSblood	LP00099_GT17-03022_TCCGGAGA-ACGTCCTG_S13_L004	A	81391389	75888539	73907588	1980951	125904	1855047	1855047
29	OurStudyALSblood	LP00100_GT17-02917_ATTACTCG-TCAGAGCC_S3_L001	C	79235843	71735910	69210356	2525554	29015	2496539	2496539
30	OurStudyALSblood	LP00102_GT17-02921_ATTACTCG-TAAGATTA_S7_L002	C	76248277	67394918	65305998	2088920	74343	2014577	2014577
31	OurStudyALSblood	LP00104_GT17-02927_TCCGGAGA-GTCAGTAC_S7_L002	B	86623295	78956067	76213656	2742411	100757	2641654	2641654
32	OurStudyALSblood	LP00112_GT17-02947_GAATTCGT-GCCTCTAT_S11_L003	B	80192170	72857802	70893082	1964720	108362	1856358	1856358
33	OurStudyALSblood	LP00124_GT17-02974_TAATGCGC-ACGTCCTG_S31_L008	A	74087510	67236188	65220296	2015892	85698	1930194	1930194
34	OurStudyALSblood	LP00129_GT17-02926_TCCGGAGA-ACGTCCTG_S5_L002	A	76216501	68798414	66798460	1999954	57156	1942798	1942798
35	OurStudyALSblood	LP00131_GT17-02955_GAATTCGT-TAAGATTA_S13_L004	B	73298538	66678492	65109373	1569119	104343	1464776	1464776
36	OurStudyALSblood	LP00140_GT17-02938_GAGATTCC-CTTCGCCT_S20_L005	A	74238871	65830612	64127530	1703082	63370	1639712	1639712
37	OurStudyALSblood	LP00141_GT17-02915_TCCGGAGA-GCCTCTAT_S4_L001	B	81063180	72414805	69909301	2505504	102560	2402944	2402944
38	OurStudyALSblood	LP00142_GT17-02939_GAGATTCC-TAAGATTA_S19_L005	B	68466018	61080036	59636433	1443603	115955	1327648	1327648
39	OurStudyALSblood	LP00157_GT17-02913_ATTACTCG-GCCTCTAT_S3_L001	C	73344668	64657688	62569726	2087962	97478	1990484	1990484
40	OurStudyALSblood	LP00165_GT17-02930_GAGATTCC-AGGCTATA_S10_L003	A	70032893	62643224	60697619	1945605	78980	1866625	1866625
41	OurStudyALSblood	LP00171_GT17-02923_TCCGGAGA-TAAGATTA_S5_L002	B	73890838	66558819	64329804	2229015	63268	2165747	2165747
42	OurStudyALSblood	LP00172_GT17-02931_GAGATTCC-GCCTCTAT_S9_L003	B	74634852	66782442	65165929	1616513	106182	1510331	1510331
43	OurStudyALSblood	LP00179_GT17-03018_TCCGGAGA-CTTCGCCT_S32_L008	A	83880021	76343668	74586753	1756915	17000	1739915	1739915
44	OurStudyALSblood	LP00180_GT17-02953_ATTCAGAA-TAAGATTA_S16_L004	C	81121371	73758697	71857964	1900733	69076	1831657	1831657
45	OurStudyALSblood	LP00187_GT17-02959_GAATTCGT-GTCAGTAC_S19_L005	B	75715188	69028457	66616827	2411630	83824	2327806	2327806
46	OurStudyALSblood	LP00192_GT17-02986_TCCGCGAA-CTTCGCCT_S12_L003	A	92549199	86666342	84019056	2647286	66182	2581104	2581104
47	OurStudyALSblood	LP00193_GT17-02978_TCCGCGAA-AGGCTATA_S4_L001	A	82181798	76498059	73995999	2502060	28628	2473432	2473432
48	OurStudyALSblood	LP00197_GT17-02954_GAATTCGT-CTTCGCCT_S14_L004	A	84693782	76518924	74470800	2048124	82284	1965840	1965840
49	OurStudyALSblood	LP00202_GT17-02970_TAATGCGC-CTTCGCCT_S27_L007	A	74956708	67562489	65342783	2219706	44267	2175439	2175439
50	OurStudyALSblood	LP00204_GT17-03006_AGCGATAG-ACGTCCTG_S20_L005	A	74517519	68153627	66374370	1779257	123162	1656095	1656095
51	OurStudyALSblood	LP00206_GT17-02963_TAATGCGC-GCCTCTAT_S30_L008	B	67881956	60031568	58416756	1614812	144489	1470323	1470323
52	OurStudyALSblood	LP00214_GT17-02950_GAATTCGT-AGGATAGG_S28_L007	A	78656006	70072841	68164712	1908129	77079	1831050	1831050
53	OurStudyALSblood	LP00215_GT17-02949_ATTCAGAA-TCAGAGCC_S27_L007	C	79323218	70362536	68346197	2016339	131326	1885013	1885013
54	OurStudyALSblood	LP00215_GT17-03002_AGCGATAG-CTTCGCCT_S13_L004	A	74731777	67923492	66220599	1702893	22524	1680369	1680369
55	OurStudyALSblood	LP00216_GT17-02967_TAATGCGC-TCAGAGCC_S22_L006	B	67485882	60633899	58920969	1712930	32212	1680718	1680718
56	OurStudyALSblood	LP00218_GT17-02958_GAATTCGT-ACGTCCTG_S20_L005	A	72641294	65716096	64024348	1691748	48779	1642969	1642969
57	OurStudyALSblood	LP00221_GT17-02971_TAATGCGC-TAAGATTA_S25_L007	B	72455478	64963571	63153873	1809698	123886	1685812	1685812
58	OurStudyALSblood	LP00234_GT17-02979_TCCGCGAA-GCCTCTAT_S2_L001	B	100272138	92584049	90299631	2284418	111279	2173139	2173139
59	OurStudyALSblood	LP00236_GT17-02975_TAATGCGC-GTCAGTAC_S29_L008	B	66674834	60303068	58598892	1704176	51519	1652657	1652657
60	OurStudyALSblood	LP00237_GT17-02966_TAATGCGC-AGGATAGG_S23_L006	A	74125297	66884418	65116523	1767895	40488	1727407	1727407
61	OurStudyALSblood	LP00239_GT17-03026_GAGATTCC-AGGCTATA_S17_L005	A	84423439	79058888	77449580	1609308	30723	1578585	1578585
62	OurStudyALSblood	LP00251_GT17-02983_TCCGCGAA-TCAGAGCC_S5_L002	B	89868885	84033140	80969653	3063487	64030	2999457	2999457
63	OurStudyALSblood	LP00260_GT17-03011_TCCGGAGA-GCCTCTAT_S24_L006	B	85197552	77823389	75865917	1957472	68125	1889347	1889347
64	OurStudyALSblood	LP00264_GT17-02987_TCCGCGAA-TAAGATTA_S9_L003	B	92014778	86100036	84216288	1883748	49442	1834306	1834306
65	OurStudyALSblood	LP00270_GT17-02995_AGCGATAG-GCCTCTAT_S7_L002	B	77729845	71028561	69429647	1598914	48261	1550653	1550653
66	OurStudyALSblood	LP00271_GT17-02991_TCCGCGAA-GTCAGTAC_S2_L001	B	88259238	79830108	74469597	5360511	37643	5322868	5322868
67	OurStudyALSblood	LP00272_GT17-02990_TCCGCGAA-ACGTCCTG_S3_L001	A	72560757	65237245	63016297	2220948	21189	2199759	2199759
68	OurStudyALSblood	LP00273_GT17-02994_AGCGATAG-AGGCTATA_S8_L002	A	80809829	73499855	72003589	1496266	103031	1393235	1393235
69	OurStudyALSblood	LP00274_GT17-02999_AGCGATAG-TCAGAGCC_S10_L003	B	72607870	66035808	63922119	2113689	82158	2031531	2031531
70	OurStudyALSblood	LP00275_GT17-02998_AGCGATAG-AGGATAGG_S12_L003	A	73302114	67020374	65262520	1757854	99476	1658378	1658378
71	OurStudyALSblood	LP00279_GT17-03003_AGCGATAG-TAAGATTA_S16_L004	B	75119829	68734195	67054432	1679763	64063	1615700	1615700
72	OurStudyALSblood	LP00281_GT17-03007_AGCGATAG-GTCAGTAC_S18_L005	B	71120977	65217663	62796593	2421070	75177	2345893	2345893
73	OurStudyALSblood	LP00282_GT17-03010_TCCGGAGA-AGGCTATA_S21_L006	A	83277823	76015258	74396335	1618923	166853	1452070	1452070
74	OurStudyALSblood	LP00288_GT17-03030_GAGATTCC-AGGATAGG_S22_L006	A	86358638	80446911	78901819	1545092	146376	1398716	1398716
75	OurStudyALSblood	LP00296_GT17-03027_GAGATTCC-GCCTCTAT_S19_L005	B	81400572	76299439	74509583	1789856	25805	1764051	1764051
76	OurStudyALSblood	LP00299_GT17-03015_TCCGGAGA-TCAGAGCC_S26_L007	B	80453860	73501698	71101698	2400000	146392	2253608	2253608
77	OurStudyALSblood	LP00301_GT17-03019_TCCGGAGA-TAAGATTA_S29_L008	B	85794936	78160413	76190096	1970317	149781	1820536	1820536
78	OurStudyALSblood	LP00303_GT17-03023_TCCGGAGA-GTCAGTAC_S16_L004	B	87273697	81858622	79448205	2410417	130377	2280040	2280040
79	OurStudyALSblood	LP00305_GT17-03031_GAGATTCC-TCAGAGCC_S24_L006	B	88715121	82870910	80752077	2118833	79619	2039214	2039214
80	OurStudyALSblood	LP00306_GT17-02928_CGCTCATT-AGGCTATA_S11_L003	D	72985159	65335456	63118027	2217429	111253	2106176	2106176
81	OurStudyALSblood	LP00307_GT17-02944_ATTCAGAA-AGGCTATA_S9_L003	D	75123530	67446540	65509996	1936544	69683	1866861	1866861
82	OurStudyALSblood	LP00308_GT17-02924_ATTACTCG-ACGTCCTG_S8_L002	D	78345361	69271830	67445977	1825853	107080	1718773	1718773
83	OurStudyALSblood	LP00309_GT17-02920_ATTACTCG-CTTCGCCT_S6_L002	D	65988925	58531005	56374014	2156991	78989	2078002	2078002
84	OurStudyALSblood	LP00310_GT17-02960_CTGAAGCT-AGGCTATA_S32_L008	D	93221059	81556958	79521444	2035514	76628	1958886	1958886
85	OurStudyALSblood	LP00311_GT17-02912_ATTACTCG-AGGCTATA_S1_L001	D	72795843	63680895	61429425	2251470	34482	2216988	2216988
86	OurStudyALSblood	LP00312_GT17-02940_CGCTCATT-ACGTCCTG_S21_L006	D	74635428	65956256	64569623	1386633	91667	1294966	1294966
87	OurStudyALSblood	LP00313_GT17-02916_ATTACTCG-AGGATAGG_S1_L001	D	70127353	63554195	61332798	2221397	78683	2142714	2142714
88	OurStudyALSblood	LP00314_GT17-02956_ATTCAGAA-ACGTCCTG_S18_L005	D	69060492	61598541	60162410	1436131	96516	1339615	1339615
89	OurStudyALSblood	LP00315_GT17-02948_ATTCAGAA-AGGATAGG_S25_L007	D	70206893	62353448	60846059	1507389	119879	1387510	1387510
90	OurStudyALSblood	LP0R038_GT17-02993_TCTCGCGC-GCCTCTAT_S6_L002	C	83238892	76339590	74395683	1943907	85814	1858093	1858093
91	OurStudyALSblood	LP0R039_GT17-03001_TCTCGCGC-TAAGATTA_S15_L004	C	82040955	75283993	73464218	1819775	161537	1658238	1658238
92	OurStudyALSblood	LP0R042_GT17-03025_CGCTCATT-GCCTCTAT_S18_L005	C	88953609	83382329	81444935	1937394	77193	1860201	1860201
93	OurStudyALSblood	LP0R043_GT17-02981_CGGCTATG-TCAGAGCC_S8_L002	C	80844415	75135341	72660398	2474943	60348	2414595	2414595
94	OurStudyALSblood	LP0R046_GT17-03005_TCTCGCGC-GTCAGTAC_S19_L005	C	83297087	76242591	74154704	2087887	118032	1969855	1969855
95	OurStudyALSblood	LP0R048_GT17-02997_TCTCGCGC-TCAGAGCC_S9_L003	C	83570724	76353305	74473874	1879431	127553	1751878	1751878
96	OurStudyALSblood	LP0R074_GT17-02973_CTGAAGCT-GTCAGTAC_S30_L008	C	84643512	76602426	74331692	2270734	31571	2239163	2239163
97	OurStudyALSblood	LP0R097_GT17-02961_CTGAAGCT-GCCTCTAT_S29_L008	C	86814795	76289093	74337284	1951809	779	1951030	1951030
98	OurStudyALSblood	LP0R102_GT17-02914_TCCGGAGA-AGGCTATA_S2_L001	A	81063578	72669397	69952943	2716454	24500	2691954	2691954
99	OurStudyALSblood	LP0R106_GT17-03009_ATTACTCG-GCCTCTAT_S22_L006	C	83725115	76951777	74989822	1961955	55304	1906651	1906651
100	OurStudyALSblood	LP0R109_GT17-02985_CGGCTATG-TAAGATTA_S10_L003	C	78021299	72952813	71444476	1508337	66032	1442305	1442305
101	OurStudyALSblood	LP0R115_GT17-03013_ATTACTCG-TCAGAGCC_S25_L007	C	82355089	75046341	73231677	1814664	91380	1723284	1723284
102	OurStudyALSblood	LP0R120_GT17-02965_CTGAAGCT-TCAGAGCC_S21_L006	C	82382619	73723722	71869745	1853977	60384	1793593	1793593
103	OurStudyALSblood	LP0R124_GT17-03017_ATTACTCG-TAAGATTA_S30_L008	C	74709320	67993798	66501185	1492613	72716	1419897	1419897
104	OurStudyALSblood	LP0R125_GT17-03029_CGCTCATT-TCAGAGCC_S23_L006	C	87755196	81776508	80016507	1760001	84453	1675548	1675548
105	OurStudyALSblood	LP0R127_GT17-02969_CTGAAGCT-TAAGATTA_S28_L007	C	81323546	72437424	70384575	2052849	83147	1969702	1969702
106	OurStudyALSblood	LP0R137_GT17-02977_CGGCTATG-GCCTCTAT_S3_L001	C	79729738	74034553	71661417	2373136	116211	2256925	2256925
107	OurStudyALSblood	LP0R138_GT17-02989_CGGCTATG-GTCAGTAC_S1_L001	C	77197386	69042416	67359654	1682762	63719	1619043	1619043
108	OurStudyALSblood	LP0R155_GT17-02922_TCCGGAGA-CTTCGCCT_S8_L002	A	82590305	73641324	71192307	2449017	74008	2375009	2375009
109	OurStudyALSblood	LP0R156_GT17-03021_ATTACTCG-GTCAGTAC_S15_L004	C	87826963	82225196	80417793	1807403	97774	1709629	1709629
110	OurStudyALSblood	LP0R162_GT17-02972_CTGAAGCT-ACGTCCTG_S32_L008	D	77376644	69378866	67542007	1836859	115570	1721289	1721289
111	OurStudyALSblood	LP0R163_GT17-02976_CGGCTATG-AGGCTATA_S1_L001	D	82335315	76747915	73911529	2836386	141512	2694874	2694874
112	OurStudyALSblood	LP0R164_GT17-02980_CGGCTATG-AGGATAGG_S7_L002	D	83060296	77390705	74866406	2524299	47407	2476892	2476892
113	OurStudyALSblood	LP0R165_GT17-02984_CGGCTATG-CTTCGCCT_S11_L003	D	78281418	73134666	70674006	2460660	128352	2332308	2332308
114	OurStudyALSblood	LP0R166_GT17-02988_CGGCTATG-ACGTCCTG_S4_L001	D	70545730	63299837	60728325	2571512	66974	2504538	2504538
115	OurStudyALSblood	LP0R167_GT17-02992_TCTCGCGC-AGGCTATA_S5_L002	D	83085984	76532411	74112536	2419875	124874	2295001	2295001
116	OurStudyALSblood	LP0R168_GT17-02996_TCTCGCGC-AGGATAGG_S11_L003	D	85949256	78221800	76521082	1700718	57768	1642950	1642950
117	OurStudyALSblood	LP0R169_GT17-03000_TCTCGCGC-CTTCGCCT_S14_L004	D	81847606	74418730	72515621	1903109	108806	1794303	1794303
118	OurStudyALSblood	LP0R170_GT17-03004_TCTCGCGC-ACGTCCTG_S17_L005	D	85849707	78273435	76612633	1660802	63460	1597342	1597342
119	OurStudyALSblood	LP0R171_GT17-03008_ATTACTCG-AGGCTATA_S23_L006	D	73257148	66741646	65323271	1418375	132145	1286230	1286230
120	OurStudyALSblood	LP0R172_GT17-03012_ATTACTCG-AGGATAGG_S27_L007	D	79476616	72396016	70877092	1518924	104881	1414043	1414043
121	OurStudyALSblood	LP0R173_GT17-03016_ATTACTCG-CTTCGCCT_S31_L008	D	76093982	69156853	67572833	1584020	131712	1452308	1452308
122	OurStudyALSblood	LP0R174_GT17-03020_ATTACTCG-ACGTCCTG_S14_L004	D	86225445	80565298	78715819	1849479	148219	1701260	1701260
123	OurStudyALSblood	LP0R175_GT17-03024_CGCTCATT-AGGCTATA_S20_L005	D	92693985	87042324	85267594	1774730	113459	1661271	1661271
124	OurStudyALSblood	LP0R176_GT17-03028_CGCTCATT-AGGATAGG_S21_L006	D	83256597	77595791	76047037	1548754	116385	1432369	1432369
0	Linsley2014	all	all	2720968437	2467117257	2413276753	53840504	15929222	37911282	37911282
1	Linsley2014	als	als	428119223	378681404	370962046	7719358	2386000	5333358	5333358
2	Linsley2014	control	control	533758120	480288633	469542096	10746537	3053304	7693233	7693233
3	Linsley2014	msposttreatment	msposttreatment	467739125	425346735	416189610	9157125	2882507	6274618	6274618
4	Linsley2014	mspretreatment	mspretreatment	405438986	369294070	360914120	8379950	2384698	5995252	5995252
5	Linsley2014	sepsis	sepsis	398736555	366954497	359215561	7738936	2179443	5559493	5559493
6	Linsley2014	type1diabetes	type1diabetes	487176428	446551918	436453320	10098598	3043270	7055328	7055328
7	Linsley2014	SRR1551061	als	27775102	24500828	24026690	474138	170863	303275	303275
8	Linsley2014	SRR1551062	als	18764210	16675487	16358082	317405	107580	209825	209825
9	Linsley2014	SRR1551063	als	18506288	16500384	16126966	373418	129699	243719	243719
10	Linsley2014	SRR1551064	als	22349704	19538852	19158567	380285	137424	242861	242861
11	Linsley2014	SRR1551065	als	31091872	27584336	27045713	538623	197498	341125	341125
12	Linsley2014	SRR1551066	als	21764638	19111422	18720847	390575	124890	265685	265685
13	Linsley2014	SRR1551067	als	20967454	18285411	17691256	594155	77065	517090	517090
14	Linsley2014	SRR1551075	als	19778856	17477256	17123992	353264	66652	286612	286612
15	Linsley2014	SRR1551076	als	20023174	17875954	17513049	362905	105800	257105	257105
16	Linsley2014	SRR1551077	als	21878873	19269532	18822045	447487	126338	321149	321149
17	Linsley2014	SRR1551078	als	23256213	20354429	19944272	410157	118057	292100	292100
18	Linsley2014	SRR1551079	als	19102025	17123813	16762582	361231	100604	260627	260627
19	Linsley2014	SRR1551080	als	20361995	18100498	17745375	355123	123726	231397	231397
20	Linsley2014	SRR1551081	als	25010913	22293637	21762534	531103	123387	407716	407716
21	Linsley2014	SRR1551108	als	6146025	5541189	5438481	102708	38848	63860	63860
22	Linsley2014	SRR1551109	als	6329729	5684443	5580454	103989	32442	71547	71547
23	Linsley2014	SRR1551110	als	5686912	5017891	4925549	92342	38176	54166	54166
24	Linsley2014	SRR1551111	als	12309815	10916428	10738106	178322	75165	103157	103157
25	Linsley2014	SRR1551112	als	30370659	27189502	26734294	455208	197722	257486	257486
26	Linsley2014	SRR1551113	als	27769957	24247310	23844894	402416	163393	239023	239023
27	Linsley2014	SRR1551114	als	28874809	25392802	24898298	494504	130671	363833	363833
28	Linsley2014	SRR1550981	control	21878596	21018394	20415482	602912	122196	480716	480716
29	Linsley2014	SRR1550986	control	15170780	14572277	14185195	387082	77968	309114	309114
30	Linsley2014	SRR1550987	control	17740657	17091702	16643239	448463	117935	330528	330528
31	Linsley2014	SRR1550988	control	18985188	18374084	17834074	540010	142166	397844	397844
32	Linsley2014	SRR1550989	control	15752774	15133180	14760692	372488	110824	261664	261664
33	Linsley2014	SRR1550990	control	13394578	12876570	12543688	332882	99040	233842	233842
34	Linsley2014	SRR1550991	control	8983775	8278498	8073783	204715	71224	133491	133491
35	Linsley2014	SRR1551047	control	20264683	17853896	17484519	369377	105961	263416	263416
36	Linsley2014	SRR1551048	control	18451941	16468024	16162127	305897	95929	209968	209968
37	Linsley2014	SRR1551049	control	19455550	17245855	16889951	355904	116144	239760	239760
38	Linsley2014	SRR1551050	control	25428087	22478935	22041536	437399	130439	306960	306960
39	Linsley2014	SRR1551051	control	18241906	16301078	15981652	319426	102796	216630	216630
40	Linsley2014	SRR1551052	control	19287815	17318727	16959671	359056	120980	238076	238076
41	Linsley2014	SRR1551053	control	20596601	18067798	17674129	393669	112678	280991	280991
42	Linsley2014	SRR1551054	control	21299311	18978177	18595552	382625	135271	247354	247354
43	Linsley2014	SRR1551055	control	17419429	15594601	15299115	295486	89925	205561	205561
44	Linsley2014	SRR1551056	control	29182181	25680702	25107660	573042	184673	388369	388369
45	Linsley2014	SRR1551057	control	21293876	18596205	18253619	342586	112160	230426	230426
46	Linsley2014	SRR1551058	control	17816106	15839151	15527060	312091	104423	207668	207668
47	Linsley2014	SRR1551059	control	18547056	15646890	15227365	419525	110170	309355	309355
48	Linsley2014	SRR1551060	control	19237380	16998910	16614383	384527	116980	267547	267547
49	Linsley2014	SRR1551068	control	21014408	18748325	18378577	369748	131123	238625	238625
50	Linsley2014	SRR1551069	control	15968441	14164174	13878113	286061	89480	196581	196581
51	Linsley2014	SRR1551070	control	19528542	17641064	17218499	422565	53806	368759	368759
52	Linsley2014	SRR1551071	control	19098826	16913509	16545840	367669	105782	261887	261887
53	Linsley2014	SRR1551072	control	20997967	18371296	17986341	384955	90503	294452	294452
54	Linsley2014	SRR1551073	control	17882516	15646537	15287372	359165	126479	232686	232686
55	Linsley2014	SRR1551074	control	20839150	18390074	17972862	417212	76249	340963	340963
56	Linsley2014	SRR1550983	msposttreatment	18748609	17978019	17457932	520087	91345	428742	428742
57	Linsley2014	SRR1550997	msposttreatment	15923495	15300628	14880768	419860	113146	306714	306714
58	Linsley2014	SRR1550998	msposttreatment	19994739	19035998	18575344	460654	129328	331326	331326
59	Linsley2014	SRR1550999	msposttreatment	13641609	13021529	12631731	389798	108836	280962	280962
60	Linsley2014	SRR1551000	msposttreatment	14391150	13315625	13021968	293657	98765	194892	194892
61	Linsley2014	SRR1551001	msposttreatment	19197862	18422342	17945057	477285	126836	350449	350449
62	Linsley2014	SRR1551040	msposttreatment	17746670	16634054	16282442	351612	118187	233425	233425
63	Linsley2014	SRR1551041	msposttreatment	19574886	18260043	17854393	405650	104927	300723	300723
64	Linsley2014	SRR1551042	msposttreatment	18722272	17712392	17323367	389025	141839	247186	247186
65	Linsley2014	SRR1551044	msposttreatment	20730673	19471405	19072469	398936	106101	292835	292835
66	Linsley2014	SRR1551045	msposttreatment	21059415	19774485	19305396	469089	170243	298846	298846
67	Linsley2014	SRR1551046	msposttreatment	21817104	19897039	19396049	500990	138773	362217	362217
68	Linsley2014	SRR1551101	msposttreatment	20529349	18387307	18063315	323992	129488	194504	194504
69	Linsley2014	SRR1551102	msposttreatment	63881211	55604590	54676813	927777	308213	619564	619564
70	Linsley2014	SRR1551103	msposttreatment	51641490	46005017	45063729	941288	352235	589053	589053
71	Linsley2014	SRR1551104	msposttreatment	45990414	40846368	40075349	771019	275873	495146	495146
72	Linsley2014	SRR1551105	msposttreatment	55121711	47641155	46694086	947069	315706	631363	631363
73	Linsley2014	SRR1551106	msposttreatment	4278968	3762414	3682666	79748	29079	50669	50669
74	Linsley2014	SRR1551107	msposttreatment	4747498	4276325	4186736	89589	23587	66002	66002
75	Linsley2014	SRR1550982	mspretreatment	22131940	21014726	20469488	545238	104091	441147	441147
76	Linsley2014	SRR1550992	mspretreatment	25593693	23958414	23377379	581035	133691	447344	447344
77	Linsley2014	SRR1550993	mspretreatment	16466842	15371473	15027112	344361	100385	243976	243976
78	Linsley2014	SRR1550994	mspretreatment	19062401	18214677	17727454	487223	137412	349811	349811
79	Linsley2014	SRR1550995	mspretreatment	21748963	20455651	19877413	578238	140826	437412	437412
80	Linsley2014	SRR1550996	mspretreatment	22697880	21286863	20510627	776236	151496	624740	624740
81	Linsley2014	SRR1551033	mspretreatment	20798695	19431556	18900760	530796	142395	388401	388401
82	Linsley2014	SRR1551034	mspretreatment	19948310	18854834	18488961	365873	124773	241100	241100
83	Linsley2014	SRR1551035	mspretreatment	17615346	16586191	16170303	415888	144184	271704	271704
84	Linsley2014	SRR1551036	mspretreatment	27341129	25088086	24564282	523804	169560	354244	354244
85	Linsley2014	SRR1551037	mspretreatment	19158269	17592477	17226479	365998	124319	241679	241679
86	Linsley2014	SRR1551038	mspretreatment	16782505	15670368	15322233	348135	126026	222109	222109
87	Linsley2014	SRR1551039	mspretreatment	15389899	13779212	13469321	309891	86102	223789	223789
88	Linsley2014	SRR1551095	mspretreatment	14596435	12727568	12531572	195996	78706	117290	117290
89	Linsley2014	SRR1551096	mspretreatment	32146379	27321553	26891855	429698	139457	290241	290241
90	Linsley2014	SRR1551097	mspretreatment	12241041	10607135	10397625	209510	70855	138655	138655
91	Linsley2014	SRR1551098	mspretreatment	15623085	13722146	13480553	241593	83584	158009	158009
92	Linsley2014	SRR1551099	mspretreatment	23133405	20478929	20105758	373171	128062	245109	245109
93	Linsley2014	SRR1551100	mspretreatment	42962769	37132211	36374945	757266	198774	558492	558492
94	Linsley2014	SRR1551013	sepsis	17443540	15856936	15487711	369225	111137	258088	258088
95	Linsley2014	SRR1551014	sepsis	17349366	16117035	15803196	313839	96455	217384	217384
96	Linsley2014	SRR1551015	sepsis	17330379	14470086	13996858	473228	118910	354318	354318
97	Linsley2014	SRR1551016	sepsis	21945731	19978633	19581281	397352	125548	271804	271804
98	Linsley2014	SRR1551017	sepsis	29398965	26703968	26188463	515505	124249	391256	391256
99	Linsley2014	SRR1551018	sepsis	19729064	18761126	18353076	408050	138119	269931	269931
100	Linsley2014	SRR1551019	sepsis	17751250	16159983	15780326	379657	108328	271329	271329
101	Linsley2014	SRR1551020	sepsis	18694546	17483946	17148557	335389	91093	244296	244296
102	Linsley2014	SRR1551021	sepsis	28477140	25836513	25399545	436968	111325	325643	325643
103	Linsley2014	SRR1551022	sepsis	17179080	16031007	15705652	325355	108322	217033	217033
104	Linsley2014	SRR1551023	sepsis	25437073	24076744	23614969	461775	137812	323963	323963
105	Linsley2014	SRR1551024	sepsis	16214798	15002899	14621516	381383	114555	266828	266828
106	Linsley2014	SRR1551025	sepsis	18294133	16296220	15919270	376950	75187	301763	301763
107	Linsley2014	SRR1551026	sepsis	14597648	13559409	13319364	240045	80915	159130	159130
108	Linsley2014	SRR1551027	sepsis	27488670	25590700	25163476	427224	125848	301376	301376
109	Linsley2014	SRR1551028	sepsis	24951752	23037152	22497845	539307	94576	444731	444731
110	Linsley2014	SRR1551029	sepsis	19166862	18089648	17741571	348077	116384	231693	231693
111	Linsley2014	SRR1551030	sepsis	16092911	15053036	14746780	306256	97932	208324	208324
112	Linsley2014	SRR1551031	sepsis	17691283	16691563	16326421	365142	128319	236823	236823
113	Linsley2014	SRR1551032	sepsis	13502364	12157893	11819684	338209	74429	263780	263780
114	Linsley2014	SRR1550984	type1diabetes	20602186	19429241	18942999	486242	123936	362306	362306
115	Linsley2014	SRR1550985	type1diabetes	17899803	17316044	16797811	518233	86850	431383	431383
116	Linsley2014	SRR1551002	type1diabetes	25300835	23993474	23432583	560891	154677	406214	406214
117	Linsley2014	SRR1551003	type1diabetes	23069524	21850809	21372274	478535	130175	348360	348360
118	Linsley2014	SRR1551004	type1diabetes	19257959	18261394	17737774	523620	143889	379731	379731
119	Linsley2014	SRR1551005	type1diabetes	25173451	23563528	22981501	582027	178526	403501	403501
120	Linsley2014	SRR1551006	type1diabetes	70578594	64818932	63378378	1440554	533033	907521	907521
121	Linsley2014	SRR1551007	type1diabetes	11845319	11344577	11021469	323108	92028	231080	231080
122	Linsley2014	SRR1551008	type1diabetes	8840140	8366706	8144257	222449	59894	162555	162555
123	Linsley2014	SRR1551009	type1diabetes	18301766	17319337	16901955	417382	125394	291988	291988
124	Linsley2014	SRR1551010	type1diabetes	14955212	14172166	13783571	388595	115913	272682	272682
125	Linsley2014	SRR1551011	type1diabetes	14745620	14091435	13712190	379245	102776	276469	276469
126	Linsley2014	SRR1551012	type1diabetes	18434938	17595452	17111333	484119	123554	360565	360565
127	Linsley2014	SRR1551082	type1diabetes	9978043	8837302	8651341	185961	58906	127055	127055
128	Linsley2014	SRR1551083	type1diabetes	18133116	16006471	15721076	285395	92701	192694	192694
129	Linsley2014	SRR1551084	type1diabetes	39528624	35633251	34997095	636156	225001	411155	411155
130	Linsley2014	SRR1551085	type1diabetes	8220738	7368678	7235502	133176	44410	88766	88766
131	Linsley2014	SRR1551086	type1diabetes	27271150	23820648	23411816	408832	127738	281094	281094
132	Linsley2014	SRR1551087	type1diabetes	7405532	6409545	6266569	142976	36254	106722	106722
133	Linsley2014	SRR1551088	type1diabetes	9991120	8858345	8699902	158443	58196	100247	100247
134	Linsley2014	SRR1551089	type1diabetes	13135943	11325381	11128261	197120	67048	130072	130072
135	Linsley2014	SRR1551090	type1diabetes	10256394	9015643	8834965	180678	68078	112600	112600
136	Linsley2014	SRR1551091	type1diabetes	7872484	6956850	6839247	117603	40565	77038	77038
137	Linsley2014	SRR1551092	type1diabetes	10473941	9289667	9127509	162158	53696	108462	108462
138	Linsley2014	SRR1551093	type1diabetes	7812510	6631079	6481755	149324	46978	102346	102346
139	Linsley2014	SRR1551094	type1diabetes	28091486	24275963	23740187	535776	153054	382722	382722
0	Gagliardi2018	all	all	1826951884	1528881756	1500502055	28379701	2951699	25428002	25428002
1	Gagliardi2018	CTL	CTL	273625662	225901305	220624140	5277165	370536	4906629	4906629
2	Gagliardi2018	FUS	FUS	196290833	169809509	167503087	2306422	447549	1858873	1858873
3	Gagliardi2018	SOD	SOD	199055504	171383272	168837508	2545764	344489	2201275	2201275
4	Gagliardi2018	SYM	SYM	962499963	805971525	790886203	15085322	1368938	13716384	13716384
5	Gagliardi2018	TAR	TAR	195479922	155816145	152651117	3165028	420187	2744841	2744841
6	Gagliardi2018	SRR6246135	SYM	82954039	61358304	58661117	2697187	143498	2553689	2553689
7	Gagliardi2018	SRR6246136	SYM	92460057	79865195	78871985	993210	129855	863355	863355
8	Gagliardi2018	SRR6246137	SYM	93880921	83131435	81969493	1161942	163445	998497	998497
9	Gagliardi2018	SRR6246138	SYM	90954141	65781893	62702070	3079823	149946	2929877	2929877
10	Gagliardi2018	SRR6246139	SYM	91830052	80723444	79796751	926693	141106	785587	785587
11	Gagliardi2018	SRR6246140	SYM	87399502	78711832	77587636	1124196	127815	996381	996381
12	Gagliardi2018	SRR6246141	SYM	103002153	91570418	90833008	737410	110483	626927	626927
13	Gagliardi2018	SRR6246142	SYM	77291263	67807645	66834345	973300	86408	886892	886892
14	Gagliardi2018	SRR6246143	SYM	73228745	53192765	52169191	1023574	101604	921970	921970
15	Gagliardi2018	SRR6246144	SYM	91237179	73879408	72454429	1424979	92919	1332060	1332060
16	Gagliardi2018	SRR6246145	SYM	78261911	69949186	69006178	943008	121859	821149	821149
17	Gagliardi2018	SRR6246146	FUS	98229017	83365759	82062966	1302793	300582	1002211	1002211
18	Gagliardi2018	SRR6246147	FUS	98061816	86443750	85440121	1003629	146967	856662	856662
19	Gagliardi2018	SRR6246148	SOD	114048908	97159597	95657220	1502377	197610	1304767	1304767
20	Gagliardi2018	SRR6246149	SOD	85006596	74223675	73180288	1043387	146879	896508	896508
21	Gagliardi2018	SRR6246150	TAR	79353961	59622260	57861699	1760561	201888	1558673	1558673
22	Gagliardi2018	SRR6246151	TAR	116125961	96193885	94789418	1404467	218299	1186168	1186168
23	Gagliardi2018	SRR6246152	CTL	98499657	77487219	73604361	3882858	132314	3750544	3750544
24	Gagliardi2018	SRR6246153	CTL	85148202	72986241	72289911	696330	110820	585510	585510
25	Gagliardi2018	SRR6246154	CTL	89977803	75427845	74729868	697977	127402	570575	570575
0	Brohawn2016	all	all	1029209103	804793326	755002361	49790965	2282982	47507983	47507983
1	Brohawn2016	ALS	ALS	482758358	373608601	350666920	22941681	1075224	21866457	21866457
2	Brohawn2016	CTL	CTL	546450745	431184725	404335441	26849284	1207758	25641526	25641526
3	Brohawn2016	ALS01	ALS	71751242	52800085	49724034	3076051	148901	2927150	2927150
4	Brohawn2016	ALS02	ALS	58733563	48156246	45103822	3052424	120533	2931891	2931891
5	Brohawn2016	ALS03	ALS	78396564	61698900	58004310	3694590	202080	3492510	3492510
6	Brohawn2016	ALS04	ALS	64766445	47688066	44905358	2782708	134178	2648530	2648530
7	Brohawn2016	ALS09	ALS	86159146	63499414	59448448	4050966	217328	3833638	3833638
8	Brohawn2016	ALS10	ALS	61859461	50054074	46923492	3130582	124406	3006176	3006176
9	Brohawn2016	ALS14	ALS	61091937	49711816	46557456	3154360	127798	3026562	3026562
10	Brohawn2016	CTL06	CTL	85201841	63742266	59402759	4339507	236785	4102722	4102722
11	Brohawn2016	CTL08	CTL	80875842	61338949	57372633	3966316	191348	3774968	3774968
12	Brohawn2016	CTL16	CTL	75351862	55913930	52294015	3619915	172221	3447694	3447694
13	Brohawn2016	CTL22	CTL	56079411	45567029	42968949	2598080	131751	2466329	2466329
14	Brohawn2016	CTL23	CTL	63210261	51178764	48003935	3174829	111322	3063507	3063507
15	Brohawn2016	CTL24	CTL	60243905	49515199	46508257	3006942	123045	2883897	2883897
16	Brohawn2016	CTL25	CTL	64248956	53430244	50198675	3231569	106672	3124897	3124897
17	Brohawn2016	CTL27	CTL	61238667	50498344	47586218	2912126	134614	2777512	2777512
0	Ladd2017	all	all	703960973	621030163	561735778	59294385	690261	58604124	58604124
1	Ladd2017	ALS	ALS	286237883	251812422	227585846	24226576	303821	23922755	23922755
2	Ladd2017	CTL	CTL	417723090	369217741	334149932	35067809	386440	34681369	34681369
3	Ladd2017	ALS_01	ALS	71826052	62919667	56619212	6300455	84156	6216299	6216299
4	Ladd2017	ALS_02	ALS	75919791	67547970	61738435	5809535	48033	5761502	5761502
5	Ladd2017	ALS_03	ALS	72510489	63943865	58342270	5601595	79121	5522474	5522474
6	Ladd2017	ALS_04	ALS	65981551	57400920	50885929	6514991	92511	6422480	6422480
7	Ladd2017	CTL_06	CTL	73923138	65256957	59573852	5683105	83904	5599201	5599201
8	Ladd2017	CTL_07	CTL	67215337	59219866	53040273	6179593	50248	6129345	6129345
9	Ladd2017	CTL_08	CTL	67678527	60052247	54298358	5753889	60010	5693879	5693879
10	Ladd2017	CTL_13	CTL	68736154	60720510	55183944	5536566	61738	5474828	5474828
11	Ladd2017	CTL_15	CTL	70744037	62620650	56061220	6559430	90460	6468970	6468970
12	Ladd2017	CTL_16	CTL	69425897	61347511	55992285	5355226	40080	5315146	5315146
0	Brohawn2019	all	all	2433612935	1984443096	1917171623	67271473	6550305	60721168	60721168
1	Brohawn2019	AD	AD	526919251	459715431	446632026	13083405	1474163	11609242	11609242
2	Brohawn2019	ALS	ALS	481876212	390325830	378155370	12170460	1255546	10914914	10914914
3	Brohawn2019	CTL	CTL	650161497	535192004	518397305	16794699	1490443	15304256	15304256
4	Brohawn2019	PD	PD	774655975	599209831	573986922	25222909	2330153	22892756	22892756
5	Brohawn2019	AD_00137	AD	31392455	27355354	26547888	807466	83453	724013	724013
6	Brohawn2019	AD_00138	AD	29171496	25835452	25133564	701888	78569	623319	623319
7	Brohawn2019	AD_00144	AD	31767114	28008752	27250829	757923	96488	661435	661435
8	Brohawn2019	AD_00147	AD	28386002	24912153	24214292	697861	85763	612098	612098
9	Brohawn2019	AD_00150	AD	30092348	26419573	25744895	674678	76733	597945	597945
10	Brohawn2019	AD_00151	AD	46234278	36706096	35248961	1457135	149284	1307851	1307851
11	Brohawn2019	AD_00156	AD	28895953	25471171	24774435	696736	79863	616873	616873
12	Brohawn2019	AD_00178	AD	31818413	28168665	27425229	743436	85139	658297	658297
13	Brohawn2019	AD_00190	AD	28384816	25086141	24409472	676669	67138	609531	609531
14	Brohawn2019	AD_00191	AD	28891802	25528203	24825234	702969	82551	620418	620418
15	Brohawn2019	AD_00196	AD	28379208	25046097	24348758	697339	86033	611306	611306
16	Brohawn2019	AD_00208	AD	31263495	27429770	26679958	749812	71654	678158	678158
17	Brohawn2019	AD_00212	AD	29763755	25869879	25109785	760094	94207	665887	665887
18	Brohawn2019	AD_00215	AD	29124232	25778848	25066492	712356	79682	632674	632674
19	Brohawn2019	AD_00216	AD	32329628	28709003	27920963	788040	81585	706455	706455
20	Brohawn2019	AD_00223	AD	32872680	28966639	28198403	768236	92743	675493	675493
21	Brohawn2019	AD_00248	AD	28151576	24423635	23732868	690767	83278	607489	607489
22	Brohawn2019	AD_CTL_00161	CTL	52198783	40075399	38207444	1867955	181589	1686366	1686366
23	Brohawn2019	AD_CTL_00164	CTL	52669382	41305182	39584952	1720230	148827	1571403	1571403
24	Brohawn2019	ALS_00001	ALS	71666361	56333853	54693139	1640714	198614	1442100	1442100
25	Brohawn2019	ALS_00002	ALS	58582366	50616488	49007294	1609194	160689	1448505	1448505
26	Brohawn2019	ALS_00003	ALS	78317134	61720352	59790509	1929843	212893	1716950	1716950
27	Brohawn2019	ALS_00004	ALS	64607820	48229909	46658289	1571620	153210	1418410	1418410
28	Brohawn2019	ALS_00009	ALS	86053161	67788126	65607133	2180993	274690	1906303	1906303
29	Brohawn2019	ALS_00010	ALS	61697844	52553176	50981428	1571748	124299	1447449	1447449
30	Brohawn2019	ALS_00014	ALS	60951526	53083926	51417578	1666348	131151	1535197	1535197
31	Brohawn2019	CTL_00006	CTL	85114702	66656284	64356446	2299838	256092	2043746	2043746
32	Brohawn2019	CTL_00008	CTL	80801159	63757415	61747495	2009920	213571	1796349	1796349
33	Brohawn2019	CTL_00016	CTL	75237554	58660116	56843785	1816331	164256	1652075	1652075
34	Brohawn2019	CTL_00022	CTL	55930886	48688884	47437942	1250942	111660	1139282	1139282
35	Brohawn2019	CTL_00023	CTL	63016167	54329863	52781441	1548422	115150	1433272	1433272
36	Brohawn2019	CTL_00024	CTL	60053044	52501829	51115441	1386388	97415	1288973	1288973
37	Brohawn2019	CTL_00025	CTL	64041599	56097133	54538476	1558657	82581	1476076	1476076
38	Brohawn2019	CTL_00027	CTL	61098221	53119899	51783883	1336016	119302	1216714	1216714
39	Brohawn2019	PD_00003	PD	36647609	28030314	26764099	1266215	99770	1166445	1166445
40	Brohawn2019	PD_00006	PD	34766477	26415158	25242514	1172644	111054	1061590	1061590
41	Brohawn2019	PD_00007	PD	39780424	30788232	29356901	1431331	111016	1320315	1320315
42	Brohawn2019	PD_00008	PD	39299165	29894817	28535140	1359677	119863	1239814	1239814
43	Brohawn2019	PD_00010	PD	38909700	29748905	28410642	1338263	100029	1238234	1238234
44	Brohawn2019	PD_00011	PD	41270520	32537520	31150522	1386998	162696	1224302	1224302
45	Brohawn2019	PD_00018	PD	37735417	29290859	28005450	1285409	120611	1164798	1164798
46	Brohawn2019	PD_00019	PD	39708898	30574363	29216069	1358294	132029	1226265	1226265
47	Brohawn2019	PD_00143	PD	46625451	36506104	35038872	1467232	123503	1343729	1343729
48	Brohawn2019	PD_00145	PD	40585921	31344851	30099823	1245028	104176	1140852	1140852
49	Brohawn2019	PD_00160	PD	39920646	30612961	29316901	1296060	93831	1202229	1202229
50	Brohawn2019	PD_00170	PD	38910806	29828474	28495380	1333094	132221	1200873	1200873
51	Brohawn2019	PD_00171	PD	42418699	33117275	31764492	1352783	133418	1219365	1219365
52	Brohawn2019	PD_00174	PD	37361332	28407199	27192499	1214700	119303	1095397	1095397
53	Brohawn2019	PD_00179	PD	44530694	35056158	33674855	1381303	140053	1241250	1241250
54	Brohawn2019	PD_00187	PD	43788753	34320164	33082045	1238119	131818	1106301	1106301
55	Brohawn2019	PD_00228	PD	47236686	37454252	36010769	1443483	133471	1310012	1310012
56	Brohawn2019	PD_63834	PD	46200314	35025560	33558815	1466745	145444	1321301	1321301
57	Brohawn2019	PD_66205	PD	38958463	30256665	29071134	1185531	115847	1069684	1069684
0	Humphrys2016	all	all	5329925	4866495	4254362	612133	7700	604433	604433
1	Humphrys2016	TW4_POLYA	TW4_POLYA	118363	106144	62250	43894	123	43771	43771
2	Humphrys2016	TW4_TOTAL	TW4_TOTAL	936874	838868	392960	445908	419	445489	445489
3	Humphrys2016	one_POLYA	one_POLYA	141752	126177	120117	6060	278	5782	5782
4	Humphrys2016	one_TOTAL	one_TOTAL	4132936	3795306	3679035	116271	6880	109391	109391
5	Humphrys2016	one_TOTAL1	one_TOTAL	64902	55852	54902	950	36	914	914
6	Humphrys2016	one_TOTAL2	one_TOTAL	63851	56869	55476	1393	77	1316	1316
7	Humphrys2016	one_TOTAL3	one_TOTAL	4004183	3682585	3568657	113928	6767	107161	107161
8	Humphrys2016	TW4_TOTAL1	TW4_TOTAL	65071	60502	35843	24659	82	24577	24577
9	Humphrys2016	TW4_TOTAL2	TW4_TOTAL	798684	714146	312322	401824	301	401523	401523
10	Humphrys2016	TW4_TOTAL3	TW4_TOTAL	73119	64220	44795	19425	36	19389	19389
11	Humphrys2016	one_POLYA1	one_POLYA	74058	67857	63515	4342	203	4139	4139
12	Humphrys2016	one_POLYA2	one_POLYA	39600	34411	33131	1280	64	1216	1216
13	Humphrys2016	one_POLYA3	one_POLYA	28094	23909	23471	438	11	427	427
14	Humphrys2016	TW4_POLYA1	TW4_POLYA	32971	29528	12961	16567	10	16557	16557
15	Humphrys2016	TW4_POLYA2	TW4_POLYA	45781	42058	23960	18098	95	18003	18003
16	Humphrys2016	TW4_POLYA3	TW4_POLYA	39611	34558	25329	9229	18	9211	9211
0	Emanuel2020	all	all	281272608	269911406	187332244	82579162	287843	82291319	82291319
1	Emanuel2020	COV1_04h	COV1_04h	30368917	29189701	28341550	848151	42630	805521	805521
2	Emanuel2020	COV1_12h	COV1_12h	31972854	30582054	12124726	18457328	19175	18438153	18438153
3	Emanuel2020	COV1_24h	COV1_24h	35749971	34396675	7375502	27021173	12475	27008698	27008698
4	Emanuel2020	COV2_04h	COV2_04h	31430042	30094819	28719288	1375531	23609	1351922	1351922
5	Emanuel2020	COV2_12h	COV2_12h	31192517	30073137	12992203	17080934	21884	17059050	17059050
6	Emanuel2020	COV2_24h	COV2_24h	32341166	31078800	15775780	15303020	29879	15273141	15273141
7	Emanuel2020	MOCK_04h	MOCK_04h	28311586	27114743	26433261	681482	45076	636406	636406
8	Emanuel2020	MOCK_24h	MOCK_24h	30931070	29636690	28981268	655422	46040	609382	609382
9	Emanuel2020	UNTR_04h	UNTR_04h	28974485	27744787	26588666	1156121	47075	1109046	1109046
10	Emanuel2020	Calu3_MOCK_24h_1	MOCK_24h	15656259	14989934	14776222	213712	22683	191029	191029
11	Emanuel2020	Calu3_MOCK_24h_2	MOCK_24h	15274811	14646756	14205046	441710	23357	418353	418353
12	Emanuel2020	Calu3_MOCK_04h_1	MOCK_04h	13056540	12497822	12265489	232333	22479	209854	209854
13	Emanuel2020	Calu3_MOCK_04h_2	MOCK_04h	15255046	14616921	14167772	449149	22597	426552	426552
14	Emanuel2020	Calu3_COV1_12h_1	COV1_12h	16733160	16137319	6686911	9450408	10841	9439567	9439567
15	Emanuel2020	Calu3_COV1_12h_2	COV1_12h	15239694	14444735	5437815	9006920	8334	8998586	8998586
16	Emanuel2020	Calu3_COV1_24h_1	COV1_24h	17934396	17366825	3795791	13571034	5343	13565691	13565691
17	Emanuel2020	Calu3_COV1_24h_2	COV1_24h	17815575	17029850	3579711	13450139	7132	13443007	13443007
18	Emanuel2020	Calu3_COV1_04h_1	COV1_04h	14578050	14037959	13748204	289755	15814	273941	273941
19	Emanuel2020	Calu3_COV1_04h_2	COV1_04h	15790867	15151742	14593346	558396	26816	531580	531580
20	Emanuel2020	Calu3_COV2_12h_1	COV2_12h	15651170	15099033	6619189	8479844	11331	8468513	8468513
21	Emanuel2020	Calu3_COV2_12h_2	COV2_12h	15541347	14974104	6373014	8601090	10553	8590537	8590537
22	Emanuel2020	Calu3_COV2_24h_1	COV2_24h	15281469	14679845	6973355	7706490	12474	7694016	7694016
23	Emanuel2020	Calu3_COV2_24h_2	COV2_24h	17059697	16398955	8802425	7596530	17405	7579125	7579125
24	Emanuel2020	Calu3_COV2_04h_1	COV2_04h	16011056	15329255	14638734	690521	1144	689377	689377
25	Emanuel2020	Calu3_COV2_04h_2	COV2_04h	15418986	14765564	14080554	685010	22465	662545	662545
26	Emanuel2020	Calu3_UNTR_04h_1	UNTR_04h	13196375	12644379	11882991	761388	19593	741795	741795
27	Emanuel2020	Calu3_UNTR_04h_2	UNTR_04h	15778110	15100408	14705675	394733	27482	367251	367251
0	VonSchack2018	all	all	799989745	728359982	723873318	4486664	2051049	2435615	2435615
1	VonSchack2018	polya_blood	polya_blood	199986614	177321693	175297430	2024263	1250185	774078	774078
2	VonSchack2018	polya_colon	polya_colon	200002992	177703056	176788044	915012	405640	509372	509372
3	VonSchack2018	total_blood	total_blood	199992976	182783261	182259588	523673	228180	295493	295493
4	VonSchack2018	total_colon	total_colon	200007163	190551972	189528256	1023716	167044	856672	856672
5	VonSchack2018	SRR6410618	total_blood	50005765	45051100	44917266	133834	53406	80428	80428
6	VonSchack2018	SRR6410617	total_blood	49990603	45100565	44959867	140698	56939	83759	83759
7	VonSchack2018	SRR6410616	total_blood	49999100	45330069	45203202	126867	57554	69313	69313
8	VonSchack2018	SRR6410615	total_blood	49997508	47301527	47179253	122274	60281	61993	61993
9	VonSchack2018	SRR6410614	polya_blood	49996267	43571101	43059363	511738	308119	203619	203619
10	VonSchack2018	SRR6410613	polya_blood	49995049	46928702	46407632	521070	313553	207517	207517
11	VonSchack2018	SRR6410612	polya_blood	49997356	43891318	43373037	518281	319703	198578	198578
12	VonSchack2018	SRR6410611	polya_blood	49997942	42930572	42457398	473174	308810	164364	164364
13	VonSchack2018	SRR6410610	total_colon	50003344	47790109	47513915	276194	34994	241200	241200
14	VonSchack2018	SRR6410609	total_colon	50006668	47783068	47535273	247795	33933	213862	213862
15	VonSchack2018	SRR6410608	total_colon	49997014	47781971	47533481	248490	34374	214116	214116
16	VonSchack2018	SRR6410607	total_colon	50000137	47196824	46945587	251237	63743	187494	187494
17	VonSchack2018	SRR6410606	polya_colon	49996562	46692812	46471378	221434	100951	120483	120483
18	VonSchack2018	SRR6410605	polya_colon	49998397	43438245	43189056	249189	101290	147899	147899
19	VonSchack2018	SRR6410604	polya_colon	50002111	43738171	43515405	222766	102605	120161	120161
20	VonSchack2018	SRR6410603	polya_colon	50005922	43833828	43612205	221623	100794	120829	120829
0	Shin2014	all	all	925123735	681199697	644788679	36411018	922308	35488710	35488710
1	Shin2014	GD	GD	442497103	306118983	283643905	22475078	432505	22042573	22042573
2	Shin2014	NGD	NGD	482626632	375080714	361144774	13935940	489803	13446137	13446137
3	Shin2014	SRR1060753	GD	12083804	7376234	5208992	2167242	8426	2158816	2158816
4	Shin2014	SRR1060754	GD	36467109	27425901	25861414	1564487	30992	1533495	1533495
5	Shin2014	SRR1060755	GD	28697162	20123201	18998475	1124726	26436	1098290	1098290
6	Shin2014	SRR1060756	GD	14869486	9304773	8626530	678243	11465	666778	666778
7	Shin2014	SRR1060757	GD	33353039	24831719	23551166	1280553	31180	1249373	1249373
8	Shin2014	SRR1060758	GD	22051065	14676798	13647875	1028923	20571	1008352	1008352
9	Shin2014	SRR1060759	GD	23861756	17164673	16005932	1158741	24063	1134678	1134678
10	Shin2014	SRR1060760	GD	7236029	3274083	2929261	344822	6705	338117	338117
11	Shin2014	SRR1060761	GD	24408714	17182103	16021627	1160476	28039	1132437	1132437
12	Shin2014	SRR1060762	GD	1987399	503759	441679	62080	1061	61019	61019
13	Shin2014	SRR1060763	GD	16144646	11210720	10475323	735397	10905	724492	724492
14	Shin2014	SRR1060764	GD	23298020	16180585	15122675	1057910	27360	1030550	1030550
15	Shin2014	SRR1060765	GD	11022354	6592544	4672067	1920477	7946	1912531	1912531
16	Shin2014	SRR1060766	GD	32159063	24464523	23067013	1397510	35845	1361665	1361665
17	Shin2014	SRR1060767	GD	25462031	17937237	16933282	1003955	27053	976902	976902
18	Shin2014	SRR1060768	GD	13455119	8338177	7733185	604992	10678	594314	594314
19	Shin2014	SRR1060769	GD	29785254	22437473	21272647	1164826	29342	1135484	1135484
20	Shin2014	SRR1060770	GD	19637331	12963129	12050452	912677	20710	891967	891967
21	Shin2014	SRR1060771	GD	21467700	15366492	14325548	1040944	25097	1015847	1015847
22	Shin2014	SRR1060772	GD	6841913	2923613	2615124	308489	6284	302205	302205
23	Shin2014	SRR1060773	GD	21614867	15287347	14251510	1035837	26718	1009119	1009119
24	Shin2014	SRR1060774	GD	2059836	458465	401554	56911	954	55957	55957
25	Shin2014	SRR1060775	GD	14533406	10095434	9430574	664860	14675	650185	650185
26	Shin2014	SRR1060776	NGD	28021451	21908988	19387594	2521394	21403	2499991	2499991
27	Shin2014	SRR1060777	NGD	36770004	29044819	28443575	601244	38842	562402	562402
28	Shin2014	SRR1060778	NGD	28734878	22586515	21999901	586614	28891	557723	557723
29	Shin2014	SRR1060779	NGD	21100408	16418141	15946836	471305	16419	454886	454886
30	Shin2014	SRR1060780	NGD	25282543	19948329	19427777	520552	3188	517364	517364
31	Shin2014	SRR1060781	NGD	20816412	16339322	15852763	486559	17620	468939	468939
32	Shin2014	SRR1060782	NGD	19420602	15107250	14718209	389041	13002	376039	376039
33	Shin2014	SRR1060783	NGD	15708695	12042455	11710714	331741	11459	320282	320282
34	Shin2014	SRR1060784	NGD	12931138	10185355	9909039	276316	9305	267011	267011
35	Shin2014	SRR1060785	NGD	13933960	10604721	10325771	278950	9473	269477	269477
36	Shin2014	SRR1060786	NGD	14536091	11250777	10948959	301818	10159	291659	291659
37	Shin2014	SRR1060787	NGD	11737260	8821915	8581915	240000	8955	231045	231045
38	Shin2014	SRR1060788	NGD	25998485	20184541	17812444	2372097	24406	2347691	2347691
39	Shin2014	SRR1060789	NGD	34002573	26710867	26108676	602191	49201	552990	552990
40	Shin2014	SRR1060790	NGD	26340293	20551655	19969433	582222	34440	547782	547782
41	Shin2014	SRR1060791	NGD	19970884	15403285	14924620	478665	24519	454146	454146
42	Shin2014	SRR1060792	NGD	24487792	19184000	18635796	548204	41858	506346	506346
43	Shin2014	SRR1060793	NGD	19617134	15299404	14805688	493716	27400	466316	466316
44	Shin2014	SRR1060794	NGD	18214618	14067580	13668765	398815	28302	370513	370513
45	Shin2014	SRR1060795	NGD	14333697	10884053	10558426	325627	16580	309047	309047
46	Shin2014	SRR1060796	NGD	12492463	9769541	9480266	289275	13135	276140	276140
47	Shin2014	SRR1060797	NGD	13137464	9863732	9581296	282436	12467	269969	269969
48	Shin2014	SRR1060798	NGD	13903521	10646730	10335677	311053	15468	295585	295585
49	Shin2014	SRR1060799	NGD	11134266	8256739	8010634	246105	13311	232794	232794

## Sheet: Regular biome contig amounts
	sample	initial_contigs	human	mouse	Chordata	Viridiplantae	Artificial	dataset
0	all	2951173	2158823	139	65078	1305	702492	OurStudyALSblood
1	group_A	2497408	1813320	81	57159	207	618486	OurStudyALSblood
2	group_B	2517857	1832505	87	56528	189	621538	OurStudyALSblood
3	group_C	2510514	1823120	93	57178	210	622441	OurStudyALSblood
4	group_D	2486450	1799433	82	57770	1065	619962	OurStudyALSblood
5	LP00001_GT17-02932_CGCTCATT-AGGATAGG_S15_L004	162743	123848	27	8951	12	29469	OurStudyALSblood
6	LP00005_GT17-02918_TCCGGAGA-AGGATAGG_S4_L001	310106	233951	48	14952	32	60131	OurStudyALSblood
7	LP00017_GT17-02941_CGCTCATT-GTCAGTAC_S22_L006	260900	197747	37	11680	29	50836	OurStudyALSblood
8	LP00018_GT17-03014_TCCGGAGA-AGGATAGG_S28_L007	230143	174090	32	10398	11	45243	OurStudyALSblood
9	LP00020_GT17-02925_ATTACTCG-GTCAGTAC_S6_L002	226378	169836	35	11697	43	43855	OurStudyALSblood
10	LP00023_GT17-02957_ATTCAGAA-GTCAGTAC_S17_L005	278307	210243	44	12707	14	54679	OurStudyALSblood
11	LP00024_GT17-02946_GAATTCGT-AGGCTATA_S10_L003	198196	148067	29	10339	14	39216	OurStudyALSblood
12	LP00025_GT17-02942_GAGATTCC-ACGTCCTG_S23_L006	269793	204485	45	12927	7	51943	OurStudyALSblood
13	LP00027_GT17-02968_CTGAAGCT-CTTCGCCT_S26_L007	324726	243859	48	15416	12	64903	OurStudyALSblood
14	LP00030_GT17-02933_CGCTCATT-TCAGAGCC_S14_L004	308911	230154	39	12864	8	65351	OurStudyALSblood
15	LP00031_GT17-02945_ATTCAGAA-GCCTCTAT_S12_L003	268755	200409	23	11631	8	56216	OurStudyALSblood
16	LP00034_GT17-02937_CGCTCATT-TAAGATTA_S17_L005	192087	142770	30	8905	14	39859	OurStudyALSblood
17	LP00041_GT17-02982_TCCGCGAA-AGGATAGG_S6_L002	355955	270549	44	16743	35	67372	OurStudyALSblood
18	LP00043_GT17-02964_CTGAAGCT-AGGATAGG_S24_L006	233982	173494	38	10472	7	49424	OurStudyALSblood
19	LP00045_GT17-02919_TCCGGAGA-TCAGAGCC_S2_L001	353760	264618	48	15084	16	73519	OurStudyALSblood
20	LP00046_GT17-02936_CGCTCATT-CTTCGCCT_S18_L005	314061	231959	38	13773	9	67842	OurStudyALSblood
21	LP00069_GT17-02951_GAATTCGT-TCAGAGCC_S26_L007	234089	177607	38	10955	7	45059	OurStudyALSblood
22	LP00070_GT17-02935_GAGATTCC-TCAGAGCC_S13_L004	204571	153745	33	9335	11	40928	OurStudyALSblood
23	LP00075_GT17-02952_ATTCAGAA-CTTCGCCT_S15_L004	299302	218830	40	13870	882	65070	OurStudyALSblood
24	LP00083_GT17-02934_GAGATTCC-AGGATAGG_S16_L004	193876	147218	23	9921	5	36244	OurStudyALSblood
25	LP00086_GT17-02929_CGCTCATT-GCCTCTAT_S12_L003	265095	197405	29	11839	9	55440	OurStudyALSblood
26	LP00087_GT17-02943_GAGATTCC-GTCAGTAC_S24_L006	192538	146697	41	10808	13	34319	OurStudyALSblood
27	LP00094_GT17-02962_TAATGCGC-AGGCTATA_S31_L008	144887	110768	30	7002	10	26837	OurStudyALSblood
28	LP00099_GT17-03022_TCCGGAGA-ACGTCCTG_S13_L004	227519	170277	30	10340	8	46527	OurStudyALSblood
29	LP00100_GT17-02917_ATTACTCG-TCAGAGCC_S3_L001	318034	239983	40	13731	17	63710	OurStudyALSblood
30	LP00102_GT17-02921_ATTACTCG-TAAGATTA_S7_L002	247685	184254	40	11706	16	51254	OurStudyALSblood
31	LP00104_GT17-02927_TCCGGAGA-GTCAGTAC_S7_L002	340145	255769	46	14396	8	69423	OurStudyALSblood
32	LP00112_GT17-02947_GAATTCGT-GCCTCTAT_S11_L003	232923	172731	33	10402	31	49355	OurStudyALSblood
33	LP00124_GT17-02974_TAATGCGC-ACGTCCTG_S31_L008	237287	177389	37	10461	6	48950	OurStudyALSblood
34	LP00129_GT17-02926_TCCGGAGA-ACGTCCTG_S5_L002	233989	176086	43	11394	20	45900	OurStudyALSblood
35	LP00131_GT17-02955_GAATTCGT-TAAGATTA_S13_L004	165544	124000	31	7690	10	33506	OurStudyALSblood
36	LP00140_GT17-02938_GAGATTCC-CTTCGCCT_S20_L005	207725	155945	33	10099	14	41197	OurStudyALSblood
37	LP00141_GT17-02915_TCCGGAGA-GCCTCTAT_S4_L001	321906	242790	40	15273	7	63296	OurStudyALSblood
38	LP00142_GT17-02939_GAGATTCC-TAAGATTA_S19_L005	159609	120238	23	7881	8	31063	OurStudyALSblood
39	LP00157_GT17-02913_ATTACTCG-GCCTCTAT_S3_L001	240405	181872	47	12260	9	45811	OurStudyALSblood
40	LP00165_GT17-02930_GAGATTCC-AGGCTATA_S10_L003	236179	178156	36	11174	8	46301	OurStudyALSblood
41	LP00171_GT17-02923_TCCGGAGA-TAAGATTA_S5_L002	263783	197344	35	12763	13	53063	OurStudyALSblood
42	LP00172_GT17-02931_GAGATTCC-GCCTCTAT_S9_L003	175870	134350	28	9001	7	32177	OurStudyALSblood
43	LP00179_GT17-03018_TCCGGAGA-CTTCGCCT_S32_L008	196755	149157	32	9156	8	38085	OurStudyALSblood
44	LP00180_GT17-02953_ATTCAGAA-TAAGATTA_S16_L004	229253	169938	46	11581	32	46949	OurStudyALSblood
45	LP00187_GT17-02959_GAATTCGT-GTCAGTAC_S19_L005	293224	220412	39	12655	6	59722	OurStudyALSblood
46	LP00192_GT17-02986_TCCGCGAA-CTTCGCCT_S12_L003	319985	237771	51	15144	13	66096	OurStudyALSblood
47	LP00193_GT17-02978_TCCGCGAA-AGGCTATA_S4_L001	292598	216690	49	14842	27	59909	OurStudyALSblood
48	LP00197_GT17-02954_GAATTCGT-CTTCGCCT_S14_L004	252906	185426	38	12369	44	53897	OurStudyALSblood
49	LP00202_GT17-02970_TAATGCGC-CTTCGCCT_S27_L007	279876	208315	26	12259	8	58788	OurStudyALSblood
50	LP00204_GT17-03006_AGCGATAG-ACGTCCTG_S20_L005	187193	141628	32	9471	11	35638	OurStudyALSblood
51	LP00206_GT17-02963_TAATGCGC-GCCTCTAT_S30_L008	171904	130093	24	8379	24	32965	OurStudyALSblood
52	LP00214_GT17-02950_GAATTCGT-AGGATAGG_S28_L007	202011	154807	28	10263	16	36411	OurStudyALSblood
53	LP00215_GT17-02949_ATTCAGAA-TCAGAGCC_S27_L007	211762	160612	41	10878	10	39639	OurStudyALSblood
54	LP00215_GT17-03002_AGCGATAG-CTTCGCCT_S13_L004	188370	141014	28	8996	5	37944	OurStudyALSblood
55	LP00216_GT17-02967_TAATGCGC-TCAGAGCC_S22_L006	196626	148209	33	9286	9	38642	OurStudyALSblood
56	LP00218_GT17-02958_GAATTCGT-ACGTCCTG_S20_L005	186599	140970	31	9651	16	35318	OurStudyALSblood
57	LP00221_GT17-02971_TAATGCGC-TAAGATTA_S25_L007	207550	155034	32	10941	36	41048	OurStudyALSblood
58	LP00234_GT17-02979_TCCGCGAA-GCCTCTAT_S2_L001	268738	200571	32	12316	48	55083	OurStudyALSblood
59	LP00236_GT17-02975_TAATGCGC-GTCAGTAC_S29_L008	188833	142905	37	8904	12	36536	OurStudyALSblood
60	LP00237_GT17-02966_TAATGCGC-AGGATAGG_S23_L006	202393	154076	31	9927	9	37836	OurStudyALSblood
61	LP00239_GT17-03026_GAGATTCC-AGGCTATA_S17_L005	179568	136804	27	9374	27	32716	OurStudyALSblood
62	LP00251_GT17-02983_TCCGCGAA-TCAGAGCC_S5_L002	376949	283215	47	16107	10	76932	OurStudyALSblood
63	LP00260_GT17-03011_TCCGGAGA-GCCTCTAT_S24_L006	226914	168705	31	9759	7	48021	OurStudyALSblood
64	LP00264_GT17-02987_TCCGCGAA-TAAGATTA_S9_L003	196311	147344	41	10370	19	37271	OurStudyALSblood
65	LP00270_GT17-02995_AGCGATAG-GCCTCTAT_S7_L002	167662	127706	32	7874	4	31768	OurStudyALSblood
66	LP00271_GT17-02991_TCCGCGAA-GTCAGTAC_S2_L001	565584	412297	33	18529	24	134216	OurStudyALSblood
67	LP00272_GT17-02990_TCCGCGAA-ACGTCCTG_S3_L001	224138	170614	22	9688	13	43427	OurStudyALSblood
68	LP00273_GT17-02994_AGCGATAG-AGGCTATA_S8_L002	151703	114505	18	7295	6	29395	OurStudyALSblood
69	LP00274_GT17-02999_AGCGATAG-TCAGAGCC_S10_L003	230664	176735	39	11933	13	41369	OurStudyALSblood
70	LP00275_GT17-02998_AGCGATAG-AGGATAGG_S12_L003	178271	135535	30	8159	2	34277	OurStudyALSblood
71	LP00279_GT17-03003_AGCGATAG-TAAGATTA_S16_L004	178787	135485	27	8197	14	34682	OurStudyALSblood
72	LP00281_GT17-03007_AGCGATAG-GTCAGTAC_S18_L005	280635	214134	59	13924	7	52116	OurStudyALSblood
73	LP00282_GT17-03010_TCCGGAGA-AGGCTATA_S21_L006	170785	128871	31	8773	9	32506	OurStudyALSblood
74	LP00288_GT17-03030_GAGATTCC-AGGATAGG_S22_L006	136008	103713	21	7022	11	24818	OurStudyALSblood
75	LP00296_GT17-03027_GAGATTCC-GCCTCTAT_S19_L005	205125	157949	34	10397	17	36317	OurStudyALSblood
76	LP00299_GT17-03015_TCCGGAGA-TCAGAGCC_S26_L007	285021	214209	45	13544	14	56752	OurStudyALSblood
77	LP00301_GT17-03019_TCCGGAGA-TAAGATTA_S29_L008	214738	164247	43	10237	9	39688	OurStudyALSblood
78	LP00303_GT17-03023_TCCGGAGA-GTCAGTAC_S16_L004	294657	221614	40	12636	19	59959	OurStudyALSblood
79	LP00305_GT17-03031_GAGATTCC-TCAGAGCC_S24_L006	212372	159655	36	10289	9	41875	OurStudyALSblood
80	LP00306_GT17-02928_CGCTCATT-AGGCTATA_S11_L003	261847	194363	36	12175	8	54801	OurStudyALSblood
81	LP00307_GT17-02944_ATTCAGAA-AGGCTATA_S9_L003	225593	170581	36	11334	18	43153	OurStudyALSblood
82	LP00308_GT17-02924_ATTACTCG-ACGTCCTG_S8_L002	214465	157698	23	11216	14	44578	OurStudyALSblood
83	LP00309_GT17-02920_ATTACTCG-CTTCGCCT_S6_L002	254914	192552	39	12804	12	49069	OurStudyALSblood
84	LP00310_GT17-02960_CTGAAGCT-AGGCTATA_S32_L008	217948	163176	30	12245	14	41781	OurStudyALSblood
85	LP00311_GT17-02912_ATTACTCG-AGGCTATA_S1_L001	264579	199364	38	12665	8	52128	OurStudyALSblood
86	LP00312_GT17-02940_CGCTCATT-ACGTCCTG_S21_L006	141639	107837	35	7558	4	25899	OurStudyALSblood
87	LP00313_GT17-02916_ATTACTCG-AGGATAGG_S1_L001	269279	202013	37	11592	7	55304	OurStudyALSblood
88	LP00314_GT17-02956_ATTCAGAA-ACGTCCTG_S18_L005	148418	111683	30	8545	11	27532	OurStudyALSblood
89	LP00315_GT17-02948_ATTCAGAA-AGGATAGG_S25_L007	157134	118158	26	7363	4	31352	OurStudyALSblood
90	LP0R038_GT17-02993_TCTCGCGC-GCCTCTAT_S6_L002	209406	157411	34	9308	6	42272	OurStudyALSblood
91	LP0R039_GT17-03001_TCTCGCGC-TAAGATTA_S15_L004	204836	153893	35	9531	3	40992	OurStudyALSblood
92	LP0R042_GT17-03025_CGCTCATT-GCCTCTAT_S18_L005	240424	179925	42	10493	9	49492	OurStudyALSblood
93	LP0R043_GT17-02981_CGGCTATG-TCAGAGCC_S8_L002	281027	212438	30	12106	26	55986	OurStudyALSblood
94	LP0R046_GT17-03005_TCTCGCGC-GTCAGTAC_S19_L005	226249	171475	41	10151	3	44346	OurStudyALSblood
95	LP0R048_GT17-02997_TCTCGCGC-TCAGAGCC_S9_L003	202300	152473	40	9204	8	40067	OurStudyALSblood
96	LP0R074_GT17-02973_CTGAAGCT-GTCAGTAC_S30_L008	267963	203240	33	12541	49	51456	OurStudyALSblood
97	LP0R097_GT17-02961_CTGAAGCT-GCCTCTAT_S29_L008	228691	169548	27	12034	14	46268	OurStudyALSblood
98	LP0R102_GT17-02914_TCCGGAGA-AGGCTATA_S2_L001	342754	254135	51	15535	36	72516	OurStudyALSblood
99	LP0R106_GT17-03009_ATTACTCG-GCCTCTAT_S22_L006	220322	164882	42	10675	8	44422	OurStudyALSblood
100	LP0R109_GT17-02985_CGGCTATG-TAAGATTA_S10_L003	171373	129789	36	8884	4	32287	OurStudyALSblood
101	LP0R115_GT17-03013_ATTACTCG-TCAGAGCC_S25_L007	192736	143889	25	9168	8	39229	OurStudyALSblood
102	LP0R120_GT17-02965_CTGAAGCT-TCAGAGCC_S21_L006	211331	160234	41	11333	13	38790	OurStudyALSblood
103	LP0R124_GT17-03017_ATTACTCG-TAAGATTA_S30_L008	152908	115803	30	7709	5	29085	OurStudyALSblood
104	LP0R125_GT17-03029_CGCTCATT-TCAGAGCC_S23_L006	157161	117789	34	7681	9	31177	OurStudyALSblood
105	LP0R127_GT17-02969_CTGAAGCT-TAAGATTA_S28_L007	244342	182691	32	12840	21	48017	OurStudyALSblood
106	LP0R137_GT17-02977_CGGCTATG-GCCTCTAT_S3_L001	297524	222718	41	13643	22	60578	OurStudyALSblood
107	LP0R138_GT17-02989_CGGCTATG-GTCAGTAC_S1_L001	179206	134338	35	9423	10	34849	OurStudyALSblood
108	LP0R155_GT17-02922_TCCGGAGA-CTTCGCCT_S8_L002	297015	220931	30	13829	12	61565	OurStudyALSblood
109	LP0R156_GT17-03021_ATTACTCG-GTCAGTAC_S15_L004	206671	155976	32	9657	4	40668	OurStudyALSblood
110	LP0R162_GT17-02972_CTGAAGCT-ACGTCCTG_S32_L008	217427	162227	43	12033	68	42062	OurStudyALSblood
111	LP0R163_GT17-02976_CGGCTATG-AGGCTATA_S1_L001	371855	277872	50	16371	35	76974	OurStudyALSblood
112	LP0R164_GT17-02980_CGGCTATG-AGGATAGG_S7_L002	313299	231653	45	15521	21	65271	OurStudyALSblood
113	LP0R165_GT17-02984_CGGCTATG-CTTCGCCT_S11_L003	305490	229251	49	14969	18	60495	OurStudyALSblood
114	LP0R166_GT17-02988_CGGCTATG-ACGTCCTG_S4_L001	254220	188940	28	11655	19	52756	OurStudyALSblood
115	LP0R167_GT17-02992_TCTCGCGC-AGGCTATA_S5_L002	287399	215495	29	13026	12	58367	OurStudyALSblood
116	LP0R168_GT17-02996_TCTCGCGC-AGGATAGG_S11_L003	173856	130089	40	8711	7	34507	OurStudyALSblood
117	LP0R169_GT17-03000_TCTCGCGC-CTTCGCCT_S14_L004	215189	160707	45	10257	17	43368	OurStudyALSblood
118	LP0R170_GT17-03004_TCTCGCGC-ACGTCCTG_S17_L005	175553	131789	25	8769	9	34426	OurStudyALSblood
119	LP0R171_GT17-03008_ATTACTCG-AGGCTATA_S23_L006	132581	101792	35	6906	11	23496	OurStudyALSblood
120	LP0R172_GT17-03012_ATTACTCG-AGGATAGG_S27_L007	156094	117956	44	8402	12	28916	OurStudyALSblood
121	LP0R173_GT17-03016_ATTACTCG-CTTCGCCT_S31_L008	170838	129033	37	8848	9	32428	OurStudyALSblood
122	LP0R174_GT17-03020_ATTACTCG-ACGTCCTG_S14_L004	204377	151986	36	9721	11	42163	OurStudyALSblood
123	LP0R175_GT17-03024_CGCTCATT-AGGCTATA_S20_L005	207684	156891	45	10695	15	39465	OurStudyALSblood
124	LP0R176_GT17-03028_CGCTCATT-AGGATAGG_S21_L006	129935	97982	33	6921	9	24465	OurStudyALSblood
0	all	94692	76419	8	5141	214	11494	Linsley2014
1	group_als	16906	14026	5	1163	47	1252	Linsley2014
2	group_control	25892	21873	9	1770	26	1988	Linsley2014
3	group_msposttreatment	19718	16560	7	1323	18	1647	Linsley2014
4	group_mspretreatment	21462	17695	12	1482	140	1544	Linsley2014
5	group_sepsis	20292	17302	2	1379	24	1446	Linsley2014
6	group_type1diabetes	25197	21469	8	1659	39	1861	Linsley2014
7	SRR1550981	1133	960	0	83	0	68	Linsley2014
8	SRR1550982	977	778	0	77	22	64	Linsley2014
9	SRR1550983	925	815	0	41	0	54	Linsley2014
10	SRR1550984	886	742	1	65	1	49	Linsley2014
11	SRR1550985	786	653	0	60	0	59	Linsley2014
12	SRR1550986	998	879	0	55	1	56	Linsley2014
13	SRR1550987	741	579	0	40	15	42	Linsley2014
14	SRR1550988	755	633	0	61	0	48	Linsley2014
15	SRR1550989	431	352	1	40	0	24	Linsley2014
16	SRR1550990	429	339	0	31	11	34	Linsley2014
17	SRR1550991	173	130	0	24	0	10	Linsley2014
18	SRR1550992	1871	1640	0	124	0	99	Linsley2014
19	SRR1550993	618	532	0	42	0	36	Linsley2014
20	SRR1550994	640	530	2	55	0	40	Linsley2014
21	SRR1550995	764	515	0	72	29	37	Linsley2014
22	SRR1550996	1270	824	1	133	88	80	Linsley2014
23	SRR1550997	891	774	0	59	1	51	Linsley2014
24	SRR1550998	739	633	0	57	7	30	Linsley2014
25	SRR1550999	561	445	1	49	0	55	Linsley2014
26	SRR1551000	421	350	0	41	0	21	Linsley2014
27	SRR1551001	640	522	0	56	1	47	Linsley2014
28	SRR1551002	1339	1183	0	84	0	63	Linsley2014
29	SRR1551003	915	776	0	68	14	43	Linsley2014
30	SRR1551004	746	627	0	69	0	40	Linsley2014
31	SRR1551005	785	651	0	68	0	51	Linsley2014
32	SRR1551006	2337	1905	2	219	22	167	Linsley2014
33	SRR1551007	281	235	0	22	0	15	Linsley2014
34	SRR1551008	347	297	0	27	0	10	Linsley2014
35	SRR1551009	757	647	0	63	0	41	Linsley2014
36	SRR1551010	574	473	0	48	0	45	Linsley2014
37	SRR1551011	477	375	0	39	12	21	Linsley2014
38	SRR1551012	539	435	1	52	0	39	Linsley2014
39	SRR1551013	814	681	0	66	0	49	Linsley2014
40	SRR1551014	580	496	1	47	0	22	Linsley2014
41	SRR1551015	774	557	1	70	10	77	Linsley2014
42	SRR1551016	566	466	0	50	1	35	Linsley2014
43	SRR1551017	805	652	1	76	0	57	Linsley2014
44	SRR1551018	412	342	0	39	0	23	Linsley2014
45	SRR1551019	845	727	0	45	0	55	Linsley2014
46	SRR1551020	871	728	1	69	0	61	Linsley2014
47	SRR1551021	1027	881	0	74	0	62	Linsley2014
48	SRR1551022	488	399	1	46	0	27	Linsley2014
49	SRR1551023	538	406	0	61	2	57	Linsley2014
50	SRR1551024	472	362	1	46	5	33	Linsley2014
51	SRR1551025	1096	968	0	55	0	59	Linsley2014
52	SRR1551026	444	372	1	30	0	29	Linsley2014
53	SRR1551027	920	775	0	84	0	50	Linsley2014
54	SRR1551028	792	645	0	57	0	77	Linsley2014
55	SRR1551029	461	386	0	44	0	19	Linsley2014
56	SRR1551030	387	314	0	46	0	22	Linsley2014
57	SRR1551031	346	288	1	25	0	24	Linsley2014
58	SRR1551032	657	571	0	32	3	33	Linsley2014
59	SRR1551033	1253	1091	1	77	1	74	Linsley2014
60	SRR1551034	611	505	0	58	0	35	Linsley2014
61	SRR1551035	538	416	1	58	0	50	Linsley2014
62	SRR1551036	702	596	0	56	0	37	Linsley2014
63	SRR1551037	476	377	0	47	2	36	Linsley2014
64	SRR1551038	291	233	0	35	0	13	Linsley2014
65	SRR1551039	556	460	0	45	0	38	Linsley2014
66	SRR1551040	628	526	1	48	0	49	Linsley2014
67	SRR1551041	880	742	0	76	0	55	Linsley2014
68	SRR1551042	499	390	1	57	0	36	Linsley2014
69	SRR1551044	529	417	0	55	0	44	Linsley2014
70	SRR1551045	535	416	0	52	2	41	Linsley2014
71	SRR1551046	989	803	0	76	2	42	Linsley2014
72	SRR1551047	766	657	0	44	1	55	Linsley2014
73	SRR1551048	571	488	0	40	0	27	Linsley2014
74	SRR1551049	575	454	0	50	0	47	Linsley2014
75	SRR1551050	676	497	0	47	5	44	Linsley2014
76	SRR1551051	431	345	0	38	0	33	Linsley2014
77	SRR1551052	320	225	0	24	1	25	Linsley2014
78	SRR1551053	551	460	0	44	0	33	Linsley2014
79	SRR1551054	588	485	0	47	0	45	Linsley2014
80	SRR1551055	499	423	0	41	0	24	Linsley2014
81	SRR1551056	777	622	1	73	0	52	Linsley2014
82	SRR1551057	450	355	0	46	0	32	Linsley2014
83	SRR1551058	419	342	0	40	0	21	Linsley2014
84	SRR1551059	384	282	0	44	1	26	Linsley2014
85	SRR1551060	565	457	0	51	0	34	Linsley2014
86	SRR1551061	898	787	1	51	0	53	Linsley2014
87	SRR1551062	545	460	1	41	0	33	Linsley2014
88	SRR1551063	572	443	0	52	0	49	Linsley2014
89	SRR1551064	502	392	0	38	10	28	Linsley2014
90	SRR1551065	657	536	0	61	0	48	Linsley2014
91	SRR1551066	386	304	0	33	1	33	Linsley2014
92	SRR1551067	705	307	0	30	45	27	Linsley2014
93	SRR1551068	611	532	1	34	0	34	Linsley2014
94	SRR1551069	517	430	0	50	0	26	Linsley2014
95	SRR1551070	639	512	1	51	0	60	Linsley2014
96	SRR1551071	496	399	0	56	1	28	Linsley2014
97	SRR1551072	547	460	0	43	0	35	Linsley2014
98	SRR1551073	303	223	0	29	0	33	Linsley2014
99	SRR1551074	675	552	1	65	0	42	Linsley2014
100	SRR1551075	739	641	0	48	0	42	Linsley2014
101	SRR1551076	743	626	0	57	0	38	Linsley2014
102	SRR1551077	621	500	0	43	0	60	Linsley2014
103	SRR1551078	541	457	0	42	0	30	Linsley2014
104	SRR1551079	529	367	1	40	0	34	Linsley2014
105	SRR1551080	408	335	0	31	2	25	Linsley2014
106	SRR1551081	937	752	0	56	3	37	Linsley2014
107	SRR1551082	350	290	0	34	0	10	Linsley2014
108	SRR1551083	552	465	0	36	7	26	Linsley2014
109	SRR1551084	806	662	1	70	0	59	Linsley2014
110	SRR1551085	201	145	0	25	0	14	Linsley2014
111	SRR1551086	471	380	0	46	0	33	Linsley2014
112	SRR1551087	135	94	1	22	0	9	Linsley2014
113	SRR1551088	193	144	0	14	4	12	Linsley2014
114	SRR1551089	288	226	1	23	0	14	Linsley2014
115	SRR1551090	295	242	0	30	0	11	Linsley2014
116	SRR1551091	207	164	0	20	0	7	Linsley2014
117	SRR1551092	277	211	0	25	1	12	Linsley2014
118	SRR1551093	130	90	0	21	0	5	Linsley2014
119	SRR1551094	646	516	2	56	6	36	Linsley2014
120	SRR1551095	236	200	0	11	1	7	Linsley2014
121	SRR1551096	604	502	0	48	0	41	Linsley2014
122	SRR1551097	253	202	1	20	0	17	Linsley2014
123	SRR1551098	349	273	1	41	0	20	Linsley2014
124	SRR1551099	480	370	0	47	1	32	Linsley2014
125	SRR1551100	3748	2662	3	487	19	254	Linsley2014
126	SRR1551101	439	371	0	30	2	23	Linsley2014
127	SRR1551102	1246	1044	2	102	1	82	Linsley2014
128	SRR1551103	1370	1039	1	128	2	164	Linsley2014
129	SRR1551104	762	603	2	74	1	61	Linsley2014
130	SRR1551105	904	692	0	90	4	85	Linsley2014
131	SRR1551106	74	53	0	8	0	3	Linsley2014
132	SRR1551107	146	101	1	21	0	10	Linsley2014
133	SRR1551108	153	126	0	14	0	5	Linsley2014
134	SRR1551109	197	162	0	16	0	8	Linsley2014
135	SRR1551110	168	146	0	9	0	5	Linsley2014
136	SRR1551111	182	136	1	24	0	10	Linsley2014
137	SRR1551112	484	374	1	45	0	46	Linsley2014
138	SRR1551113	357	258	1	40	0	38	Linsley2014
139	SRR1551114	935	730	0	82	1	67	Linsley2014
0	all	197813	144211	54	8719	749	34944	Gagliardi2018
1	group_CTL	9778	4801	5	668	293	572	Gagliardi2018
2	group_FUS	5741	2653	12	676	197	418	Gagliardi2018
3	group_SOD	11050	7590	5	840	160	1022	Gagliardi2018
4	group_SYM	122507	93917	38	6115	107	21007	Gagliardi2018
5	group_TAR	7398	5315	12	678	56	821	Gagliardi2018
6	SRR6246135	3740	2371	3	343	77	277	Gagliardi2018
7	SRR6246136	3323	2488	1	347	21	211	Gagliardi2018
8	SRR6246137	4011	3121	2	404	3	378	Gagliardi2018
9	SRR6246138	4326	3271	7	421	12	414	Gagliardi2018
10	SRR6246139	3500	2787	3	283	9	299	Gagliardi2018
11	SRR6246140	6075	4888	2	505	10	566	Gagliardi2018
12	SRR6246141	1813	1308	1	154	9	146	Gagliardi2018
13	SRR6246142	4126	3266	1	380	4	396	Gagliardi2018
14	SRR6246143	3411	2697	1	286	4	280	Gagliardi2018
15	SRR6246144	4796	3643	3	444	4	515	Gagliardi2018
16	SRR6246145	4557	3641	3	395	8	407	Gagliardi2018
17	SRR6246146	3003	1276	10	281	116	289	Gagliardi2018
18	SRR6246147	2638	1275	1	406	82	123	Gagliardi2018
19	SRR6246148	4391	2261	2	327	158	278	Gagliardi2018
20	SRR6246149	4488	3492	5	402	9	397	Gagliardi2018
21	SRR6246150	2517	1683	9	266	20	228	Gagliardi2018
22	SRR6246151	3856	2798	1	350	32	402	Gagliardi2018
23	SRR6246152	11623	1645	1	522	530	283	Gagliardi2018
24	SRR6246153	2493	1644	1	237	34	173	Gagliardi2018
25	SRR6246154	2196	1555	0	219	36	150	Gagliardi2018
0	all	942482	736261	336	9355	86	194633	Brohawn2016
1	group_ALS	542571	430610	193	6635	71	104659	Brohawn2016
2	group_CTL	549417	435082	126	6927	19	105698	Brohawn2016
3	ALS01	72335	61113	46	2143	15	8818	Brohawn2016
4	ALS02	50346	42816	76	1752	49	5534	Brohawn2016
5	ALS03	85717	73461	7	2311	2	9852	Brohawn2016
6	ALS04	50708	44288	6	1906	3	4471	Brohawn2016
7	ALS09	100213	85487	25	2561	5	12026	Brohawn2016
8	ALS10	67091	57213	11	2120	9	7675	Brohawn2016
9	ALS14	71617	61825	44	2358	4	7335	Brohawn2016
10	CTL06	102758	86962	37	2897	3	12668	Brohawn2016
11	CTL08	95169	80049	6	2479	5	11650	Brohawn2016
12	CTL16	76958	65513	57	2096	5	9149	Brohawn2016
13	CTL22	44333	37936	5	1614	12	4565	Brohawn2016
14	CTL23	51212	44512	4	2118	6	4461	Brohawn2016
15	CTL24	47311	41295	3	1852	6	4083	Brohawn2016
16	CTL25	55787	48443	5	2142	5	5026	Brohawn2016
17	CTL27	50405	43821	40	1880	6	4616	Brohawn2016
0	all	191812	147386	263	8091	898	25005	Ladd2017
1	group_ALS	122520	96253	46	5819	414	14742	Ladd2017
2	group_CTL	83223	62464	224	4829	575	9729	Ladd2017
3	ALS_01	53609	40692	45	3318	298	6119	Ladd2017
4	ALS_02	19576	15345	9	1437	66	2081	Ladd2017
5	ALS_03	35860	29454	17	2737	42	2999	Ladd2017
6	ALS_04	36182	28521	18	2443	70	3576	Ladd2017
7	CTL_06	30134	23322	21	2442	84	2691	Ladd2017
8	CTL_07	16141	11939	150	1209	70	1749	Ladd2017
9	CTL_08	18391	13343	26	1833	85	1980	Ladd2017
10	CTL_13	10077	7172	14	1200	238	919	Ladd2017
11	CTL_15	10585	7619	41	588	58	1184	Ladd2017
12	CTL_16	9239	5765	40	1125	79	699	Ladd2017
0	all	1267994	976977	788	12393	156	274617	Brohawn2019
1	group_AD	596695	471525	27	6898	26	117613	Brohawn2019
2	group_ALS	299646	240663	339	5055	111	52969	Brohawn2019
3	group_CTL	441706	348701	211	6364	35	84283	Brohawn2019
4	group_PD	852805	661805	212	8897	44	181344	Brohawn2019
5	AD_00137	21356	17586	1	783	2	2929	Brohawn2019
6	AD_00138	18399	15333	4	745	4	2199	Brohawn2019
7	AD_00144	20801	17536	2	799	5	2407	Brohawn2019
8	AD_00147	20191	16778	4	820	5	2484	Brohawn2019
9	AD_00150	19344	16274	1	761	3	2237	Brohawn2019
10	AD_00151	59060	49254	3	1905	1	7854	Brohawn2019
11	AD_00156	19600	16371	2	739	3	2426	Brohawn2019
12	AD_00178	20603	17409	2	847	2	2246	Brohawn2019
13	AD_00190	17406	14305	2	623	5	2411	Brohawn2019
14	AD_00191	18181	15098	5	695	3	2328	Brohawn2019
15	AD_00196	20170	16645	4	770	6	2630	Brohawn2019
16	AD_00208	22204	18590	4	832	1	2725	Brohawn2019
17	AD_00212	21448	17785	1	815	3	2727	Brohawn2019
18	AD_00215	18151	14702	1	732	2	2599	Brohawn2019
19	AD_00216	23185	19444	1	811	5	2872	Brohawn2019
20	AD_00223	22140	18520	0	893	3	2635	Brohawn2019
21	AD_00248	18059	14934	2	747	5	2329	Brohawn2019
22	AD_CTL_00161	80035	65572	9	2297	3	12088	Brohawn2019
23	AD_CTL_00164	72683	60027	14	2155	17	10427	Brohawn2019
24	ALS_00001	39369	33260	94	1460	17	4296	Brohawn2019
25	ALS_00002	26362	22172	173	1117	80	2657	Brohawn2019
26	ALS_00003	51488	44239	8	1816	3	5312	Brohawn2019
27	ALS_00004	31424	27387	9	1324	7	2632	Brohawn2019
28	ALS_00009	57133	49159	34	1819	12	5970	Brohawn2019
29	ALS_00010	33421	28458	10	1310	20	3540	Brohawn2019
30	ALS_00014	39299	34074	56	1487	4	3592	Brohawn2019
31	CTL_00006	59442	50568	63	2126	3	6421	Brohawn2019
32	CTL_00008	51793	43188	13	1721	6	5562	Brohawn2019
33	CTL_00016	40520	34646	105	1298	11	4286	Brohawn2019
34	CTL_00022	20436	17265	4	886	14	2004	Brohawn2019
35	CTL_00023	28327	24604	5	1329	5	2214	Brohawn2019
36	CTL_00024	23560	20550	5	1099	5	1810	Brohawn2019
37	CTL_00025	31278	27235	4	1346	4	2476	Brohawn2019
38	CTL_00027	24736	21378	47	1074	4	2175	Brohawn2019
39	PD_00003	49416	41295	5	1738	14	6337	Brohawn2019
40	PD_00006	42211	34831	5	1577	6	5741	Brohawn2019
41	PD_00007	55629	46176	4	1873	7	7418	Brohawn2019
42	PD_00008	52472	43378	5	1791	6	7261	Brohawn2019
43	PD_00010	51288	42206	11	1745	5	7284	Brohawn2019
44	PD_00011	55649	45874	8	1875	8	7844	Brohawn2019
45	PD_00018	55123	44908	4	1633	4	8514	Brohawn2019
46	PD_00019	55020	45203	8	1791	6	7989	Brohawn2019
47	PD_00143	56722	46869	3	1898	5	7915	Brohawn2019
48	PD_00145	46386	38888	13	1622	4	5785	Brohawn2019
49	PD_00160	52362	43558	2	1701	7	7061	Brohawn2019
50	PD_00170	50367	41602	2	1778	14	6942	Brohawn2019
51	PD_00171	54126	44525	9	1637	5	7923	Brohawn2019
52	PD_00174	43185	35707	5	1563	4	5878	Brohawn2019
53	PD_00179	53060	43501	39	1641	7	7778	Brohawn2019
54	PD_00187	42754	36063	25	1523	13	5066	Brohawn2019
55	PD_00228	54532	45574	66	1846	7	6941	Brohawn2019
56	PD_63834	54297	46221	60	1735	4	6227	Brohawn2019
57	PD_66205	41946	34733	6	1462	6	5702	Brohawn2019
0	all	3257	1745	0	160	1	146	Humphrys2016
1	group_TW4_POLYA	1089	11	0	10	0	3	Humphrys2016
2	group_TW4_TOTAL	1284	48	0	10	0	9	Humphrys2016
3	group_one_POLYA	96	38	1	11	1	2	Humphrys2016
4	group_one_TOTAL	2322	1532	0	139	0	122	Humphrys2016
5	TW4_POLYA1	281	4	0	3	0	1	Humphrys2016
6	TW4_POLYA2	901	7	0	0	0	1	Humphrys2016
7	TW4_POLYA3	232	2	0	7	0	0	Humphrys2016
8	TW4_TOTAL1	1348	11	0	0	0	4	Humphrys2016
9	TW4_TOTAL2	1383	38	0	10	0	3	Humphrys2016
10	TW4_TOTAL3	633	4	0	8	0	2	Humphrys2016
11	one_POLYA1	49	25	0	2	1	1	Humphrys2016
12	one_POLYA2	51	17	0	10	0	2	Humphrys2016
13	one_POLYA3	31	9	1	6	0	0	Humphrys2016
14	one_TOTAL1	65	28	1	13	0	3	Humphrys2016
15	one_TOTAL2	102	35	0	11	0	5	Humphrys2016
16	one_TOTAL3	2222	1466	0	128	0	116	Humphrys2016
0	all	42816	21119	78	18650	30	1557	Emanuel2020
1	group_COV1_04h	1750	595	1	833	6	137	Emanuel2020
2	group_COV1_12h	2988	1175	4	1503	0	163	Emanuel2020
3	group_COV1_24h	1061	344	12	485	0	122	Emanuel2020
4	group_COV2_04h	2292	923	9	1127	3	157	Emanuel2020
5	group_COV2_12h	3140	1166	12	1518	2	184	Emanuel2020
6	group_COV2_24h	5284	2213	19	2339	2	259	Emanuel2020
7	group_MOCK_04h	4750	1861	5	2419	20	202	Emanuel2020
8	group_MOCK_24h	2773	974	1	1432	0	173	Emanuel2020
9	group_UNTR_04h	11150	5022	6	5497	3	403	Emanuel2020
10	Calu3_COV1_04h_1	381	128	0	138	0	70	Emanuel2020
11	Calu3_COV1_04h_2	1305	399	1	616	6	120	Emanuel2020
12	Calu3_COV1_12h_1	668	189	2	275	0	81	Emanuel2020
13	Calu3_COV1_12h_2	2163	804	3	1139	1	135	Emanuel2020
14	Calu3_COV1_24h_1	361	120	9	93	0	65	Emanuel2020
15	Calu3_COV1_24h_2	605	154	4	290	0	77	Emanuel2020
16	Calu3_COV2_04h_1	1203	456	3	600	0	106	Emanuel2020
17	Calu3_COV2_04h_2	990	338	7	472	2	102	Emanuel2020
18	Calu3_COV2_12h_1	574	148	11	227	0	64	Emanuel2020
19	Calu3_COV2_12h_2	2352	872	1	1202	1	143	Emanuel2020
20	Calu3_COV2_24h_1	3018	1267	12	1396	2	163	Emanuel2020
21	Calu3_COV2_24h_2	1884	689	11	828	0	151	Emanuel2020
22	Calu3_MOCK_04h_1	1317	387	3	650	17	91	Emanuel2020
23	Calu3_MOCK_04h_2	3237	1192	2	1782	1	163	Emanuel2020
24	Calu3_MOCK_24h_1	855	301	1	385	0	91	Emanuel2020
25	Calu3_MOCK_24h_2	1752	563	0	954	0	117	Emanuel2020
26	Calu3_UNTR_04h_1	7627	3373	3	3871	2	276	Emanuel2020
27	Calu3_UNTR_04h_2	2670	954	3	1422	1	130	Emanuel2020
0	all	7346	5861	31	491	48	237	VonSchack2018
1	group_polya_blood	1217	558	10	157	29	99	VonSchack2018
2	group_polya_colon	1432	1067	6	106	12	63	VonSchack2018
3	group_total_blood	466	150	0	64	10	6	VonSchack2018
4	group_total_colon	3835	3408	12	209	1	96	VonSchack2018
5	SRR6410603	153	84	0	7	2	8	VonSchack2018
6	SRR6410604	145	79	0	9	3	12	VonSchack2018
7	SRR6410605	280	85	1	61	0	14	VonSchack2018
8	SRR6410606	116	69	0	5	2	15	VonSchack2018
9	SRR6410607	439	383	0	21	0	13	VonSchack2018
10	SRR6410608	629	575	0	26	0	14	VonSchack2018
11	SRR6410609	636	538	1	33	1	21	VonSchack2018
12	SRR6410610	724	611	0	95	0	16	VonSchack2018
13	SRR6410611	123	52	0	3	1	6	VonSchack2018
14	SRR6410612	167	55	0	7	0	11	VonSchack2018
15	SRR6410613	271	70	1	47	16	25	VonSchack2018
16	SRR6410614	155	50	0	15	0	11	VonSchack2018
17	SRR6410615	85	38	0	1	0	8	VonSchack2018
18	SRR6410616	126	50	0	6	1	4	VonSchack2018
19	SRR6410617	190	43	0	52	0	8	VonSchack2018
20	SRR6410618	196	45	0	22	4	6	VonSchack2018
0	all	150921	101782	88	10983	4134	18573	Shin2014
1	group_GD	101838	65138	73	8164	4139	7316	Shin2014
2	group_NGD	87934	61840	63	6791	24	10388	Shin2014
3	SRR1060753	3899	2899	1	419	2	326	Shin2014
4	SRR1060754	15144	12398	12	1588	1	862	Shin2014
5	SRR1060755	11891	8583	9	1149	9	581	Shin2014
6	SRR1060756	6132	3883	7	552	3	339	Shin2014
7	SRR1060757	14051	11448	14	1497	12	794	Shin2014
8	SRR1060758	11359	7340	4	989	2309	469	Shin2014
9	SRR1060759	13229	9487	8	1211	4	709	Shin2014
10	SRR1060760	1800	1181	0	142	2	157	Shin2014
11	SRR1060761	10904	8087	9	1105	5	605	Shin2014
12	SRR1060762	1228	102	1	20	0	63	Shin2014
13	SRR1060763	8066	5604	2	721	4	460	Shin2014
14	SRR1060764	11785	7961	5	1023	5	585	Shin2014
15	SRR1060765	3667	2638	2	413	0	373	Shin2014
16	SRR1060766	14172	11596	13	1485	1	825	Shin2014
17	SRR1060767	11050	8032	8	1034	7	536	Shin2014
18	SRR1060768	5496	3561	6	466	2	288	Shin2014
19	SRR1060769	13375	10928	10	1411	10	732	Shin2014
20	SRR1060770	10608	6788	5	898	2244	423	Shin2014
21	SRR1060771	12301	8791	4	1179	4	595	Shin2014
22	SRR1060772	1624	1050	0	139	2	157	Shin2014
23	SRR1060773	10103	7528	1	1018	6	562	Shin2014
24	SRR1060774	1107	116	0	20	0	68	Shin2014
25	SRR1060775	7684	5328	6	711	1	386	Shin2014
26	SRR1060776	6281	4995	4	679	2	477	Shin2014
27	SRR1060777	5550	4515	4	633	12	353	Shin2014
28	SRR1060778	5333	4322	1	574	0	372	Shin2014
29	SRR1060779	3787	3079	3	384	1	271	Shin2014
30	SRR1060780	5117	4232	1	487	1	371	Shin2014
31	SRR1060781	4260	3466	1	460	0	297	Shin2014
32	SRR1060782	4082	3338	3	415	1	296	Shin2014
33	SRR1060783	3793	3068	0	386	1	246	Shin2014
34	SRR1060784	2944	2395	0	288	0	213	Shin2014
35	SRR1060785	3162	2573	1	309	1	227	Shin2014
36	SRR1060786	3065	2469	2	321	1	221	Shin2014
37	SRR1060787	2686	2178	1	274	1	184	Shin2014
38	SRR1060788	4994	3984	2	510	1	380	Shin2014
39	SRR1060789	4291	3537	1	429	6	292	Shin2014
40	SRR1060790	3935	3216	0	406	1	277	Shin2014
41	SRR1060791	2918	2319	2	330	1	232	Shin2014
42	SRR1060792	4603	3756	5	456	0	362	Shin2014
43	SRR1060793	3362	2746	2	352	1	239	Shin2014
44	SRR1060794	3388	2803	1	316	1	240	Shin2014
45	SRR1060795	2830	2298	1	270	0	219	Shin2014
46	SRR1060796	2347	1892	2	230	1	191	Shin2014
47	SRR1060797	2465	1984	1	258	0	191	Shin2014
48	SRR1060798	2427	1981	1	247	0	160	Shin2014
49	SRR1060799	2152	1734	1	206	0	185	Shin2014

## Sheet: Dark biome contig amounts
	dataset	sample	initial_darkbiome_contigs	left_afterDust	left_afterLAST
0	OurStudyALSblood	all	25815	9624	7632
1	OurStudyALSblood	group_A	12210	2458	1971
2	OurStudyALSblood	group_B	11890	1964	1580
3	OurStudyALSblood	group_C	11658	2019	1638
4	OurStudyALSblood	group_D	12971	3152	2731
5	OurStudyALSblood	LP00001_GT17-02932_CGCTCATT-AGGATAGG_S15_L004	902	43	36
6	OurStudyALSblood	LP00005_GT17-02918_TCCGGAGA-AGGATAGG_S4_L001	1724	181	168
7	OurStudyALSblood	LP00017_GT17-02941_CGCTCATT-GTCAGTAC_S22_L006	1421	68	59
8	OurStudyALSblood	LP00018_GT17-03014_TCCGGAGA-AGGATAGG_S28_L007	1120	47	38
9	OurStudyALSblood	LP00020_GT17-02925_ATTACTCG-GTCAGTAC_S6_L002	1313	149	144
10	OurStudyALSblood	LP00023_GT17-02957_ATTCAGAA-GTCAGTAC_S17_L005	1363	81	65
11	OurStudyALSblood	LP00024_GT17-02946_GAATTCGT-AGGCTATA_S10_L003	1154	54	41
12	OurStudyALSblood	LP00025_GT17-02942_GAGATTCC-ACGTCCTG_S23_L006	1514	55	47
13	OurStudyALSblood	LP00027_GT17-02968_CTGAAGCT-CTTCGCCT_S26_L007	1435	64	55
14	OurStudyALSblood	LP00030_GT17-02933_CGCTCATT-TCAGAGCC_S14_L004	1390	64	56
15	OurStudyALSblood	LP00031_GT17-02945_ATTCAGAA-GCCTCTAT_S12_L003	1172	67	52
16	OurStudyALSblood	LP00034_GT17-02937_CGCTCATT-TAAGATTA_S17_L005	992	51	41
17	OurStudyALSblood	LP00041_GT17-02982_TCCGCGAA-AGGATAGG_S6_L002	1821	260	245
18	OurStudyALSblood	LP00043_GT17-02964_CTGAAGCT-AGGATAGG_S24_L006	1124	54	46
19	OurStudyALSblood	LP00045_GT17-02919_TCCGGAGA-TCAGAGCC_S2_L001	1623	89	75
20	OurStudyALSblood	LP00046_GT17-02936_CGCTCATT-CTTCGCCT_S18_L005	1539	48	34
21	OurStudyALSblood	LP00069_GT17-02951_GAATTCGT-TCAGAGCC_S26_L007	1192	67	57
22	OurStudyALSblood	LP00070_GT17-02935_GAGATTCC-TCAGAGCC_S13_L004	1215	92	78
23	OurStudyALSblood	LP00075_GT17-02952_ATTCAGAA-CTTCGCCT_S15_L004	2562	949	933
24	OurStudyALSblood	LP00083_GT17-02934_GAGATTCC-AGGATAGG_S16_L004	1017	48	35
25	OurStudyALSblood	LP00086_GT17-02929_CGCTCATT-GCCTCTAT_S12_L003	1206	48	36
26	OurStudyALSblood	LP00087_GT17-02943_GAGATTCC-GTCAGTAC_S24_L006	1044	91	79
27	OurStudyALSblood	LP00094_GT17-02962_TAATGCGC-AGGCTATA_S31_L008	724	19	13
28	OurStudyALSblood	LP00099_GT17-03022_TCCGGAGA-ACGTCCTG_S13_L004	1284	44	36
29	OurStudyALSblood	LP00100_GT17-02917_ATTACTCG-TCAGAGCC_S3_L001	1560	97	84
30	OurStudyALSblood	LP00102_GT17-02921_ATTACTCG-TAAGATTA_S7_L002	1205	51	39
31	OurStudyALSblood	LP00104_GT17-02927_TCCGGAGA-GTCAGTAC_S7_L002	1662	79	64
32	OurStudyALSblood	LP00112_GT17-02947_GAATTCGT-GCCTCTAT_S11_L003	1086	49	36
33	OurStudyALSblood	LP00124_GT17-02974_TAATGCGC-ACGTCCTG_S31_L008	1160	64	55
34	OurStudyALSblood	LP00129_GT17-02926_TCCGGAGA-ACGTCCTG_S5_L002	1296	81	66
35	OurStudyALSblood	LP00131_GT17-02955_GAATTCGT-TAAGATTA_S13_L004	961	48	39
36	OurStudyALSblood	LP00140_GT17-02938_GAGATTCC-CTTCGCCT_S20_L005	1097	48	37
37	OurStudyALSblood	LP00141_GT17-02915_TCCGGAGA-GCCTCTAT_S4_L001	1411	33	25
38	OurStudyALSblood	LP00142_GT17-02939_GAGATTCC-TAAGATTA_S19_L005	899	31	25
39	OurStudyALSblood	LP00157_GT17-02913_ATTACTCG-GCCTCTAT_S3_L001	1130	51	38
40	OurStudyALSblood	LP00165_GT17-02930_GAGATTCC-AGGCTATA_S10_L003	1159	51	45
41	OurStudyALSblood	LP00171_GT17-02923_TCCGGAGA-TAAGATTA_S5_L002	1212	61	52
42	OurStudyALSblood	LP00172_GT17-02931_GAGATTCC-GCCTCTAT_S9_L003	923	41	29
43	OurStudyALSblood	LP00179_GT17-03018_TCCGGAGA-CTTCGCCT_S32_L008	1058	31	26
44	OurStudyALSblood	LP00180_GT17-02953_ATTCAGAA-TAAGATTA_S16_L004	1219	109	100
45	OurStudyALSblood	LP00187_GT17-02959_GAATTCGT-GTCAGTAC_S19_L005	1370	66	56
46	OurStudyALSblood	LP00192_GT17-02986_TCCGCGAA-CTTCGCCT_S12_L003	1905	181	167
47	OurStudyALSblood	LP00193_GT17-02978_TCCGCGAA-AGGCTATA_S4_L001	1863	207	196
48	OurStudyALSblood	LP00197_GT17-02954_GAATTCGT-CTTCGCCT_S14_L004	1401	199	171
49	OurStudyALSblood	LP00202_GT17-02970_TAATGCGC-CTTCGCCT_S27_L007	1353	141	122
50	OurStudyALSblood	LP00204_GT17-03006_AGCGATAG-ACGTCCTG_S20_L005	905	49	42
51	OurStudyALSblood	LP00206_GT17-02963_TAATGCGC-GCCTCTAT_S30_L008	785	47	38
52	OurStudyALSblood	LP00214_GT17-02950_GAATTCGT-AGGATAGG_S28_L007	1030	57	46
53	OurStudyALSblood	LP00215_GT17-02949_ATTCAGAA-TCAGAGCC_S27_L007	1096	90	76
54	OurStudyALSblood	LP00215_GT17-03002_AGCGATAG-CTTCGCCT_S13_L004	1059	48	38
55	OurStudyALSblood	LP00216_GT17-02967_TAATGCGC-TCAGAGCC_S22_L006	1057	50	42
56	OurStudyALSblood	LP00218_GT17-02958_GAATTCGT-ACGTCCTG_S20_L005	1004	110	100
57	OurStudyALSblood	LP00221_GT17-02971_TAATGCGC-TAAGATTA_S25_L007	1046	58	47
58	OurStudyALSblood	LP00234_GT17-02979_TCCGCGAA-GCCTCTAT_S2_L001	1549	66	52
59	OurStudyALSblood	LP00236_GT17-02975_TAATGCGC-GTCAGTAC_S29_L008	1059	62	48
60	OurStudyALSblood	LP00237_GT17-02966_TAATGCGC-AGGATAGG_S23_L006	1144	79	66
61	OurStudyALSblood	LP00239_GT17-03026_GAGATTCC-AGGCTATA_S17_L005	1185	71	64
62	OurStudyALSblood	LP00251_GT17-02983_TCCGCGAA-TCAGAGCC_S5_L002	1893	77	66
63	OurStudyALSblood	LP00260_GT17-03011_TCCGGAGA-GCCTCTAT_S24_L006	1190	38	26
64	OurStudyALSblood	LP00264_GT17-02987_TCCGCGAA-TAAGATTA_S9_L003	1381	289	271
65	OurStudyALSblood	LP00270_GT17-02995_AGCGATAG-GCCTCTAT_S7_L002	836	37	29
66	OurStudyALSblood	LP00271_GT17-02991_TCCGCGAA-GTCAGTAC_S2_L001	2099	67	50
67	OurStudyALSblood	LP00272_GT17-02990_TCCGCGAA-ACGTCCTG_S3_L001	1129	72	58
68	OurStudyALSblood	LP00273_GT17-02994_AGCGATAG-AGGCTATA_S8_L002	859	71	58
69	OurStudyALSblood	LP00274_GT17-02999_AGCGATAG-TCAGAGCC_S10_L003	1169	120	105
70	OurStudyALSblood	LP00275_GT17-02998_AGCGATAG-AGGATAGG_S12_L003	893	36	28
71	OurStudyALSblood	LP00279_GT17-03003_AGCGATAG-TAAGATTA_S16_L004	900	57	47
72	OurStudyALSblood	LP00281_GT17-03007_AGCGATAG-GTCAGTAC_S18_L005	1244	54	44
73	OurStudyALSblood	LP00282_GT17-03010_TCCGGAGA-AGGCTATA_S21_L006	902	82	68
74	OurStudyALSblood	LP00288_GT17-03030_GAGATTCC-AGGATAGG_S22_L006	949	77	68
75	OurStudyALSblood	LP00296_GT17-03027_GAGATTCC-GCCTCTAT_S19_L005	1277	58	46
76	OurStudyALSblood	LP00299_GT17-03015_TCCGGAGA-TCAGAGCC_S26_L007	1349	40	32
77	OurStudyALSblood	LP00301_GT17-03019_TCCGGAGA-TAAGATTA_S29_L008	1066	81	70
78	OurStudyALSblood	LP00303_GT17-03023_TCCGGAGA-GTCAGTAC_S16_L004	1499	52	43
79	OurStudyALSblood	LP00305_GT17-03031_GAGATTCC-TCAGAGCC_S24_L006	1491	135	124
80	OurStudyALSblood	LP00306_GT17-02928_CGCTCATT-AGGCTATA_S11_L003	1213	44	39
81	OurStudyALSblood	LP00307_GT17-02944_ATTCAGAA-AGGCTATA_S9_L003	1087	62	50
82	OurStudyALSblood	LP00308_GT17-02924_ATTACTCG-ACGTCCTG_S8_L002	1270	138	121
83	OurStudyALSblood	LP00309_GT17-02920_ATTACTCG-CTTCGCCT_S6_L002	1247	51	36
84	OurStudyALSblood	LP00310_GT17-02960_CTGAAGCT-AGGCTATA_S32_L008	1140	96	82
85	OurStudyALSblood	LP00311_GT17-02912_ATTACTCG-AGGCTATA_S1_L001	1246	53	47
86	OurStudyALSblood	LP00312_GT17-02940_CGCTCATT-ACGTCCTG_S21_L006	856	44	35
87	OurStudyALSblood	LP00313_GT17-02916_ATTACTCG-AGGATAGG_S1_L001	1227	57	38
88	OurStudyALSblood	LP00314_GT17-02956_ATTCAGAA-ACGTCCTG_S18_L005	885	54	48
89	OurStudyALSblood	LP00315_GT17-02948_ATTCAGAA-AGGATAGG_S25_L007	858	33	22
90	OurStudyALSblood	LP0R038_GT17-02993_TCTCGCGC-GCCTCTAT_S6_L002	1041	49	40
91	OurStudyALSblood	LP0R039_GT17-03001_TCTCGCGC-TAAGATTA_S15_L004	991	32	25
92	OurStudyALSblood	LP0R042_GT17-03025_CGCTCATT-GCCTCTAT_S18_L005	1388	78	69
93	OurStudyALSblood	LP0R043_GT17-02981_CGGCTATG-TCAGAGCC_S8_L002	1530	133	121
94	OurStudyALSblood	LP0R046_GT17-03005_TCTCGCGC-GTCAGTAC_S19_L005	1007	33	21
95	OurStudyALSblood	LP0R048_GT17-02997_TCTCGCGC-TCAGAGCC_S9_L003	1016	61	48
96	OurStudyALSblood	LP0R074_GT17-02973_CTGAAGCT-GTCAGTAC_S30_L008	1277	84	67
97	OurStudyALSblood	LP0R097_GT17-02961_CTGAAGCT-GCCTCTAT_S29_L008	1277	84	67
98	OurStudyALSblood	LP0R102_GT17-02914_TCCGGAGA-AGGCTATA_S2_L001	1490	52	37
99	OurStudyALSblood	LP0R106_GT17-03009_ATTACTCG-GCCTCTAT_S22_L006	1056	48	32
100	OurStudyALSblood	LP0R109_GT17-02985_CGGCTATG-TAAGATTA_S10_L003	1068	60	55
101	OurStudyALSblood	LP0R115_GT17-03013_ATTACTCG-TCAGAGCC_S25_L007	1046	51	35
102	OurStudyALSblood	LP0R120_GT17-02965_CTGAAGCT-TCAGAGCC_S21_L006	1345	142	123
103	OurStudyALSblood	LP0R124_GT17-03017_ATTACTCG-TAAGATTA_S30_L008	961	30	19
104	OurStudyALSblood	LP0R125_GT17-03029_CGCTCATT-TCAGAGCC_S23_L006	1107	76	66
105	OurStudyALSblood	LP0R127_GT17-02969_CTGAAGCT-TAAGATTA_S28_L007	1424	117	102
106	OurStudyALSblood	LP0R137_GT17-02977_CGGCTATG-GCCTCTAT_S3_L001	1455	77	58
107	OurStudyALSblood	LP0R138_GT17-02989_CGGCTATG-GTCAGTAC_S1_L001	1024	71	60
108	OurStudyALSblood	LP0R155_GT17-02922_TCCGGAGA-CTTCGCCT_S8_L002	1506	135	122
109	OurStudyALSblood	LP0R156_GT17-03021_ATTACTCG-GTCAGTAC_S15_L004	1295	49	33
110	OurStudyALSblood	LP0R162_GT17-02972_CTGAAGCT-ACGTCCTG_S32_L008	1405	188	170
111	OurStudyALSblood	LP0R163_GT17-02976_CGGCTATG-AGGCTATA_S1_L001	1926	107	93
112	OurStudyALSblood	LP0R164_GT17-02980_CGGCTATG-AGGATAGG_S7_L002	1837	160	147
113	OurStudyALSblood	LP0R165_GT17-02984_CGGCTATG-CTTCGCCT_S11_L003	1768	134	116
114	OurStudyALSblood	LP0R166_GT17-02988_CGGCTATG-ACGTCCTG_S4_L001	1291	170	156
115	OurStudyALSblood	LP0R167_GT17-02992_TCTCGCGC-AGGCTATA_S5_L002	1426	89	72
116	OurStudyALSblood	LP0R168_GT17-02996_TCTCGCGC-AGGATAGG_S11_L003	1027	69	60
117	OurStudyALSblood	LP0R169_GT17-03000_TCTCGCGC-CTTCGCCT_S14_L004	1291	125	114
118	OurStudyALSblood	LP0R170_GT17-03004_TCTCGCGC-ACGTCCTG_S17_L005	1027	79	70
119	OurStudyALSblood	LP0R171_GT17-03008_ATTACTCG-AGGCTATA_S23_L006	807	63	52
120	OurStudyALSblood	LP0R172_GT17-03012_ATTACTCG-AGGATAGG_S27_L007	1041	144	129
121	OurStudyALSblood	LP0R173_GT17-03016_ATTACTCG-CTTCGCCT_S31_L008	995	118	106
122	OurStudyALSblood	LP0R174_GT17-03020_ATTACTCG-ACGTCCTG_S14_L004	1330	87	77
123	OurStudyALSblood	LP0R175_GT17-03024_CGCTCATT-AGGCTATA_S20_L005	1355	93	79
124	OurStudyALSblood	LP0R176_GT17-03028_CGCTCATT-AGGATAGG_S21_L006	950	77	62
125	Linsley2014	all	887	335	312
126	Linsley2014	group_als	140	11	7
127	Linsley2014	group_control	169	6	5
128	Linsley2014	group_msposttreatment	182	12	9
129	Linsley2014	group_mspretreatment	432	273	271
130	Linsley2014	group_sepsis	171	22	22
131	Linsley2014	group_type1diabetes	169	3	2
132	Linsley2014	SRR1550981	5	1	1
133	Linsley2014	SRR1550982	4	2	0
134	Linsley2014	SRR1550983	4	2	1
135	Linsley2014	SRR1550984	3	2	0
136	Linsley2014	SRR1550985	4	1	0
137	Linsley2014	SRR1550986	6	1	1
138	Linsley2014	SRR1550987	22	2	2
139	Linsley2014	SRR1550988	6	1	1
140	Linsley2014	SRR1550989	3	2	2
141	Linsley2014	SRR1550990	5	1	1
142	Linsley2014	SRR1550991	8	2	2
143	Linsley2014	SRR1550992	14	1	0
144	Linsley2014	SRR1550993	14	1	0
145	Linsley2014	SRR1550994	7	2	0
146	Linsley2014	SRR1550995	3	2	0
147	Linsley2014	SRR1550996	105	88	86
148	Linsley2014	SRR1550997	9	1	1
149	Linsley2014	SRR1550998	16	2	1
150	Linsley2014	SRR1550999	5	1	1
151	Linsley2014	SRR1551000	5	2	1
152	Linsley2014	SRR1551001	5	1	0
153	Linsley2014	SRR1551002	9	0	0
154	Linsley2014	SRR1551003	10	1	0
155	Linsley2014	SRR1551004	5	0	0
156	Linsley2014	SRR1551005	8	1	0
157	Linsley2014	SRR1551006	30	2	1
158	Linsley2014	SRR1551007	7	1	0
159	Linsley2014	SRR1551008	4	1	0
160	Linsley2014	SRR1551009	19	0	0
161	Linsley2014	SRR1551010	5	1	0
162	Linsley2014	SRR1551011	7	2	0
163	Linsley2014	SRR1551012	3	0	0
164	Linsley2014	SRR1551013	7	2	1
165	Linsley2014	SRR1551014	7	0	0
166	Linsley2014	SRR1551015	30	20	19
167	Linsley2014	SRR1551016	6	2	1
168	Linsley2014	SRR1551017	10	1	0
169	Linsley2014	SRR1551018	9	0	0
170	Linsley2014	SRR1551019	2	0	0
171	Linsley2014	SRR1551020	5	0	0
172	Linsley2014	SRR1551021	14	0	0
173	Linsley2014	SRR1551022	4	0	0
174	Linsley2014	SRR1551023	1	0	0
175	Linsley2014	SRR1551024	8	2	1
176	Linsley2014	SRR1551025	5	2	1
177	Linsley2014	SRR1551026	7	0	0
178	Linsley2014	SRR1551027	14	0	0
179	Linsley2014	SRR1551028	11	2	0
180	Linsley2014	SRR1551029	6	1	0
181	Linsley2014	SRR1551030	6	1	1
182	Linsley2014	SRR1551031	9	0	0
183	Linsley2014	SRR1551032	6	3	2
184	Linsley2014	SRR1551033	14	1	0
185	Linsley2014	SRR1551034	13	2	0
186	Linsley2014	SRR1551035	8	2	0
187	Linsley2014	SRR1551036	6	1	0
188	Linsley2014	SRR1551037	7	1	0
189	Linsley2014	SRR1551038	12	1	0
190	Linsley2014	SRR1551039	2	1	0
191	Linsley2014	SRR1551040	9	2	1
192	Linsley2014	SRR1551041	9	2	0
193	Linsley2014	SRR1551042	7	1	1
194	Linsley2014	SRR1551044	6	2	1
195	Linsley2014	SRR1551045	10	1	1
196	Linsley2014	SRR1551046	3	1	1
197	Linsley2014	SRR1551047	5	2	2
198	Linsley2014	SRR1551048	7	1	1
199	Linsley2014	SRR1551049	8	1	1
200	Linsley2014	SRR1551050	7	1	1
201	Linsley2014	SRR1551051	4	2	2
202	Linsley2014	SRR1551052	3	1	1
203	Linsley2014	SRR1551053	5	2	2
204	Linsley2014	SRR1551054	10	0	0
205	Linsley2014	SRR1551055	4	1	1
206	Linsley2014	SRR1551056	11	2	2
207	Linsley2014	SRR1551057	4	2	2
208	Linsley2014	SRR1551058	2	0	0
209	Linsley2014	SRR1551059	5	2	1
210	Linsley2014	SRR1551060	4	3	3
211	Linsley2014	SRR1551061	10	0	0
212	Linsley2014	SRR1551062	10	1	0
213	Linsley2014	SRR1551063	8	1	1
214	Linsley2014	SRR1551064	5	1	1
215	Linsley2014	SRR1551065	9	1	0
216	Linsley2014	SRR1551066	10	1	0
217	Linsley2014	SRR1551067	10	7	7
218	Linsley2014	SRR1551068	8	0	0
219	Linsley2014	SRR1551069	4	1	1
220	Linsley2014	SRR1551070	6	2	2
221	Linsley2014	SRR1551071	7	3	2
222	Linsley2014	SRR1551072	3	0	0
223	Linsley2014	SRR1551073	10	2	2
224	Linsley2014	SRR1551074	5	4	4
225	Linsley2014	SRR1551075	11	1	0
226	Linsley2014	SRR1551076	3	1	1
227	Linsley2014	SRR1551077	6	3	1
228	Linsley2014	SRR1551078	6	1	0
229	Linsley2014	SRR1551079	3	0	0
230	Linsley2014	SRR1551080	8	0	0
231	Linsley2014	SRR1551081	4	1	0
232	Linsley2014	SRR1551082	1	1	0
233	Linsley2014	SRR1551083	5	2	0
234	Linsley2014	SRR1551084	16	1	0
235	Linsley2014	SRR1551085	2	1	0
236	Linsley2014	SRR1551086	7	1	0
237	Linsley2014	SRR1551087	0	0	0
238	Linsley2014	SRR1551088	3	0	0
239	Linsley2014	SRR1551089	6	1	0
240	Linsley2014	SRR1551090	1	1	0
241	Linsley2014	SRR1551091	1	1	0
242	Linsley2014	SRR1551092	1	1	0
243	Linsley2014	SRR1551093	2	1	0
244	Linsley2014	SRR1551094	6	3	2
245	Linsley2014	SRR1551095	3	0	0
246	Linsley2014	SRR1551096	16	1	0
247	Linsley2014	SRR1551097	3	1	0
248	Linsley2014	SRR1551098	5	2	0
249	Linsley2014	SRR1551099	6	1	0
250	Linsley2014	SRR1551100	216	188	187
251	Linsley2014	SRR1551101	16	1	1
252	Linsley2014	SRR1551102	31	2	1
253	Linsley2014	SRR1551103	36	7	7
254	Linsley2014	SRR1551104	26	5	4
255	Linsley2014	SRR1551105	32	4	4
256	Linsley2014	SRR1551106	2	1	1
257	Linsley2014	SRR1551107	2	2	1
258	Linsley2014	SRR1551108	1	0	0
259	Linsley2014	SRR1551109	0	0	0
260	Linsley2014	SRR1551110	2	0	0
261	Linsley2014	SRR1551111	9	2	2
262	Linsley2014	SRR1551112	19	1	0
263	Linsley2014	SRR1551113	19	1	1
264	Linsley2014	SRR1551114	6	2	2
265	Gagliardi2018	all	11991	4958	4013
266	Gagliardi2018	group_CTL	2311	1880	1833
267	Gagliardi2018	group_FUS	4304	1117	1024
268	Gagliardi2018	group_SOD	1185	738	718
269	Gagliardi2018	group_SYM	4085	395	298
270	Gagliardi2018	group_TAR	2541	184	152
271	Gagliardi2018	SRR6246135	462	322	192
272	Gagliardi2018	SRR6246136	136	29	29
273	Gagliardi2018	SRR6246137	160	10	9
274	Gagliardi2018	SRR6246138	1961	47	20
275	Gagliardi2018	SRR6246139	201	7	6
276	Gagliardi2018	SRR6246140	183	12	10
277	Gagliardi2018	SRR6246141	120	23	21
278	Gagliardi2018	SRR6246142	223	6	4
279	Gagliardi2018	SRR6246143	159	21	20
280	Gagliardi2018	SRR6246144	704	8	2
281	Gagliardi2018	SRR6246145	188	7	6
282	Gagliardi2018	SRR6246146	3563	565	536
283	Gagliardi2018	SRR6246147	696	509	506
284	Gagliardi2018	SRR6246148	963	729	726
285	Gagliardi2018	SRR6246149	265	10	8
286	Gagliardi2018	SRR6246150	2231	63	49
287	Gagliardi2018	SRR6246151	370	124	124
288	Gagliardi2018	SRR6246152	6510	5747	1846
289	Gagliardi2018	SRR6246153	109	23	22
290	Gagliardi2018	SRR6246154	148	17	16
291	Brohawn2016	all	340	85	76
292	Brohawn2016	group_ALS	158	31	29
293	Brohawn2016	group_CTL	212	50	45
294	Brohawn2016	ALS01	27	0	0
295	Brohawn2016	ALS02	55	20	19
296	Brohawn2016	ALS03	13	1	1
297	Brohawn2016	ALS04	5	0	0
298	Brohawn2016	ALS09	10	0	0
299	Brohawn2016	ALS10	16	9	8
300	Brohawn2016	ALS14	15	2	1
301	Brohawn2016	CTL06	21	1	1
302	Brohawn2016	CTL08	30	17	16
303	Brohawn2016	CTL16	22	6	5
304	Brohawn2016	CTL22	44	17	17
305	Brohawn2016	CTL23	23	1	1
306	Brohawn2016	CTL24	20	1	0
307	Brohawn2016	CTL25	23	6	5
308	Brohawn2016	CTL27	23	1	1
309	Ladd2017	all	51805	41406	40670
310	Ladd2017	group_ALS	22587	18009	17743
311	Ladd2017	group_CTL	30519	24211	23753
312	Ladd2017	ALS_01	14414	11534	11489
313	Ladd2017	ALS_02	5712	4472	4458
314	Ladd2017	ALS_03	1707	1284	1253
315	Ladd2017	ALS_04	1127	885	868
316	Ladd2017	CTL_06	7433	5768	5727
317	Ladd2017	CTL_07	6618	5465	5421
318	Ladd2017	CTL_08	4495	3509	3466
319	Ladd2017	CTL_13	3557	2703	2676
320	Ladd2017	CTL_15	8096	6127	6068
321	Ladd2017	CTL_16	1440	1014	1006
322	Brohawn2019	all	1204	379	330
323	Brohawn2019	group_AD	326	70	58
324	Brohawn2019	group_ALS	204	81	72
325	Brohawn2019	group_CTL	285	119	110
326	Brohawn2019	group_PD	494	100	88
327	Brohawn2019	AD_00137	41	4	4
328	Brohawn2019	AD_00138	28	8	6
329	Brohawn2019	AD_00144	24	3	2
330	Brohawn2019	AD_00147	38	4	4
331	Brohawn2019	AD_00150	23	5	4
332	Brohawn2019	AD_00151	32	2	1
333	Brohawn2019	AD_00156	33	3	2
334	Brohawn2019	AD_00178	26	4	4
335	Brohawn2019	AD_00190	48	2	1
336	Brohawn2019	AD_00191	40	5	4
337	Brohawn2019	AD_00196	21	4	3
338	Brohawn2019	AD_00208	28	4	2
339	Brohawn2019	AD_00212	31	5	4
340	Brohawn2019	AD_00215	40	9	6
341	Brohawn2019	AD_00216	31	3	2
342	Brohawn2019	AD_00223	30	8	6
343	Brohawn2019	AD_00248	32	6	5
344	Brohawn2019	AD_CTL_00161	26	3	2
345	Brohawn2019	AD_CTL_00164	17	1	1
346	Brohawn2019	ALS_00001	34	8	8
347	Brohawn2019	ALS_00002	74	32	31
348	Brohawn2019	ALS_00003	22	3	2
349	Brohawn2019	ALS_00004	12	0	0
350	Brohawn2019	ALS_00009	18	2	2
351	Brohawn2019	ALS_00010	41	25	24
352	Brohawn2019	ALS_00014	20	7	6
353	Brohawn2019	CTL_00006	26	2	2
354	Brohawn2019	CTL_00008	50	28	27
355	Brohawn2019	CTL_00016	31	10	9
356	Brohawn2019	CTL_00022	72	47	46
357	Brohawn2019	CTL_00023	35	11	11
358	Brohawn2019	CTL_00024	28	2	2
359	Brohawn2019	CTL_00025	29	10	9
360	Brohawn2019	CTL_00027	34	4	4
361	Brohawn2019	PD_00003	25	2	1
362	Brohawn2019	PD_00006	18	1	0
363	Brohawn2019	PD_00007	171	72	71
364	Brohawn2019	PD_00008	22	2	2
365	Brohawn2019	PD_00010	21	1	0
366	Brohawn2019	PD_00011	17	0	0
367	Brohawn2019	PD_00018	11	2	1
368	Brohawn2019	PD_00019	15	0	0
369	Brohawn2019	PD_00143	31	2	0
370	Brohawn2019	PD_00145	20	1	1
371	Brohawn2019	PD_00160	27	2	1
372	Brohawn2019	PD_00170	22	1	1
373	Brohawn2019	PD_00171	22	4	3
374	Brohawn2019	PD_00174	26	1	1
375	Brohawn2019	PD_00179	15	4	4
376	Brohawn2019	PD_00187	13	1	1
377	Brohawn2019	PD_00228	31	5	3
378	Brohawn2019	PD_63834	13	1	1
379	Brohawn2019	PD_66205	23	4	1
380	Humphrys2016	all	27	8	8
381	Humphrys2016	group_TW4_POLYA	0	0	0
382	Humphrys2016	group_TW4_TOTAL	16	6	6
383	Humphrys2016	group_one_POLYA	0	0	0
384	Humphrys2016	group_one_TOTAL	12	2	2
385	Humphrys2016	TW4_POLYA1	0	0	0
386	Humphrys2016	TW4_POLYA2	0	0	0
387	Humphrys2016	TW4_POLYA3	0	0	0
388	Humphrys2016	TW4_TOTAL1	8	4	4
389	Humphrys2016	TW4_TOTAL2	6	2	2
390	Humphrys2016	TW4_TOTAL3	2	0	0
391	Humphrys2016	one_POLYA1	0	0	0
392	Humphrys2016	one_POLYA2	0	0	0
393	Humphrys2016	one_POLYA3	0	0	0
394	Humphrys2016	one_TOTAL1	0	0	0
395	Humphrys2016	one_TOTAL2	0	0	0
396	Humphrys2016	one_TOTAL3	12	2	2
397	Emanuel2020	all	2432	49	35
398	Emanuel2020	group_COV1_04h	286	17	12
399	Emanuel2020	group_COV1_12h	80	0	0
400	Emanuel2020	group_COV1_24h	52	1	1
401	Emanuel2020	group_COV2_04h	84	1	1
402	Emanuel2020	group_COV2_12h	65	3	3
403	Emanuel2020	group_COV2_24h	109	0	0
404	Emanuel2020	group_MOCK_04h	395	10	8
405	Emanuel2020	group_MOCK_24h	200	8	6
406	Emanuel2020	group_UNTR_04h	295	8	4
407	Emanuel2020	Calu3_COV1_04h_1	58	8	5
408	Emanuel2020	Calu3_COV1_04h_2	192	9	9
409	Emanuel2020	Calu3_COV1_12h_1	54	0	0
410	Emanuel2020	Calu3_COV1_12h_2	11	0	0
411	Emanuel2020	Calu3_COV1_24h_1	23	1	1
412	Emanuel2020	Calu3_COV1_24h_2	24	0	0
413	Emanuel2020	Calu3_COV2_04h_1	19	1	1
414	Emanuel2020	Calu3_COV2_04h_2	53	0	0
415	Emanuel2020	Calu3_COV2_12h_1	25	1	1
416	Emanuel2020	Calu3_COV2_12h_2	33	2	2
417	Emanuel2020	Calu3_COV2_24h_1	26	0	0
418	Emanuel2020	Calu3_COV2_24h_2	59	0	0
419	Emanuel2020	Calu3_MOCK_04h_1	118	5	5
420	Emanuel2020	Calu3_MOCK_04h_2	217	6	4
421	Emanuel2020	Calu3_MOCK_24h_1	60	4	3
422	Emanuel2020	Calu3_MOCK_24h_2	99	3	3
423	Emanuel2020	Calu3_UNTR_04h_1	78	3	2
424	Emanuel2020	Calu3_UNTR_04h_2	163	4	4
425	VonSchack2018	all	1847	335	230
426	VonSchack2018	group_polya_blood	1566	112	17
427	VonSchack2018	group_polya_colon	53	47	31
428	VonSchack2018	group_total_blood	8	4	2
429	VonSchack2018	group_total_colon	214	202	194
430	VonSchack2018	SRR6410603	9	8	8
431	VonSchack2018	SRR6410604	7	6	6
432	VonSchack2018	SRR6410605	9	8	8
433	VonSchack2018	SRR6410606	5	5	4
434	VonSchack2018	SRR6410607	40	38	37
435	VonSchack2018	SRR6410608	59	55	55
436	VonSchack2018	SRR6410609	50	46	45
437	VonSchack2018	SRR6410610	42	38	37
438	VonSchack2018	SRR6410611	92	15	11
439	VonSchack2018	SRR6410612	168	20	13
440	VonSchack2018	SRR6410613	283	26	12
441	VonSchack2018	SRR6410614	153	17	10
442	VonSchack2018	SRR6410615	0	0	0
443	VonSchack2018	SRR6410616	2	1	1
444	VonSchack2018	SRR6410617	2	1	1
445	VonSchack2018	SRR6410618	0	0	0
446	Shin2014	all	2798	2028	1201
447	Shin2014	group_GD	2484	1988	1193
448	Shin2014	group_NGD	573	166	8
449	Shin2014	SRR1060753	14	5	2
450	Shin2014	SRR1060754	59	11	6
451	Shin2014	SRR1060755	49	14	2
452	Shin2014	SRR1060756	37	25	12
453	Shin2014	SRR1060757	71	19	13
454	Shin2014	SRR1060758	149	95	71
455	Shin2014	SRR1060759	64	22	5
456	Shin2014	SRR1060760	32	24	22
457	Shin2014	SRR1060761	63	23	7
458	Shin2014	SRR1060762	28	28	12
459	Shin2014	SRR1060763	51	21	8
460	Shin2014	SRR1060764	984	930	904
461	Shin2014	SRR1060765	8	4	0
462	Shin2014	SRR1060766	56	7	5
463	Shin2014	SRR1060767	56	18	7
464	Shin2014	SRR1060768	33	17	7
465	Shin2014	SRR1060769	61	13	10
466	Shin2014	SRR1060770	126	80	68
467	Shin2014	SRR1060771	49	19	8
468	Shin2014	SRR1060772	46	36	32
469	Shin2014	SRR1060773	53	18	4
470	Shin2014	SRR1060774	18	12	3
471	Shin2014	SRR1060775	39	11	7
472	Shin2014	SRR1060776	40	1	1
473	Shin2014	SRR1060777	57	1	1
474	Shin2014	SRR1060778	46	1	1
475	Shin2014	SRR1060779	30	1	1
476	Shin2014	SRR1060780	42	1	0
477	Shin2014	SRR1060781	28	0	0
478	Shin2014	SRR1060782	28	1	1
479	Shin2014	SRR1060783	18	1	1
480	Shin2014	SRR1060784	19	2	1
481	Shin2014	SRR1060785	18	1	1
482	Shin2014	SRR1060786	22	0	0
483	Shin2014	SRR1060787	22	2	2
484	Shin2014	SRR1060788	31	2	1
485	Shin2014	SRR1060789	56	1	0
486	Shin2014	SRR1060790	38	1	1
487	Shin2014	SRR1060791	19	1	0
488	Shin2014	SRR1060792	31	0	0
489	Shin2014	SRR1060793	21	0	0
490	Shin2014	SRR1060794	24	2	0
491	Shin2014	SRR1060795	16	0	0
492	Shin2014	SRR1060796	18	1	0
493	Shin2014	SRR1060797	15	0	0
494	Shin2014	SRR1060798	17	1	1
495	Shin2014	SRR1060799	17	2	1
